# Supplementary material for: Formation of DPM ethers using O-diphenylmethyl trichloroacetimidate under thermal conditions
Source: Royal Society of Chemistry journal article supplement (doi:10.1039/c5ob02455b), 2015-12-17
Supplement: c5ob02455b1.pdf [file c5ob02455b1.pdf]

## Supporting Information

# Formation of DPM Ethers Using O-Diphenylmethyl Trichloroacetimidate Under Thermal Conditions

*Kyle T. Howard, Brian C. Duffy, Matthew R. Linaburg and John D. Chisholm\**

Department of Chemistry, 1-014 Center for Science and Technology, Syracuse University, Syracuse,  
New York 13244

*jdchisho@syr.edu*

### Contents

|                                                |         |
|------------------------------------------------|---------|
| Table of Contents                              | S1      |
| General Information                            | S2      |
| Experimental Procedures and Indexed Spectra    | S3-S7   |
| <sup>1</sup> H and <sup>13</sup> C NMR Spectra | S8-S30  |
| Chiral HPLC Traces                             | S31-S34 |
| References                                     | S35     |

**General Information.** All anhydrous reactions were run under a positive pressure of argon or nitrogen. All syringes, needles, and reaction flasks required for anhydrous reactions were dried in an oven and cooled under an N<sub>2</sub> atmosphere or in a desiccator. DCM and THF were dried by passage through an alumina column by the method of Grubbs.<sup>1</sup> Triethylamine was distilled from CaH<sub>2</sub>. All other reagents and solvents were purchased from commercial sources and used without further purification.

**Analysis and Purification.** Analytical thin layer chromatography (TLC) was performed on precoated glass backed plates (silica gel 60 F<sub>254</sub>; 0.25 mm thickness). The TLC plates were visualized by UV illumination and by staining. Solvents for chromatography are listed as volume:volume ratios. Flash column chromatography was carried out on silica gel (40-63 μm). Melting points were recorded using an electrothermal melting point apparatus and are uncorrected. Elemental analyses were performed on an elemental analyzer with a thermal conductivity detector and 2 meter GC column maintained at 50 °C.

**Identity.** Proton (<sup>1</sup>H NMR) and carbon (<sup>13</sup>C NMR) nuclear magnetic resonance spectra were recorded at 300 or 400 MHz and 75 or 100 MHz respectively. The chemical shifts are given in parts per million (ppm) on the delta (δ) scale. Coupling constants are reported in hertz (Hz). The spectra were recorded in solutions of deuterated chloroform (CDCl<sub>3</sub>), with residual chloroform (δ 7.26 ppm for <sup>1</sup>H NMR, δ 77.23 ppm for <sup>13</sup>C NMR) or tetramethylsilane (δ 0.00 for <sup>1</sup>H NMR, δ 0.00 for <sup>13</sup>C NMR) as the internal reference. Data are reported as follows: (s = singlet; d = doublet; t = triplet; q = quartet; p = pentet; sep = septet; dd = doublet of doublets; dt = doublet of triplets; td = triplet of doublets; tt = triplet of triplets; qd = quartet of doublets; ddd = doublet of doublet of doublets; br s = broad singlet). Where applicable, the number of protons attached to the corresponding carbon atom was determined by DEPT 135 NMR. Infrared (IR) spectra were obtained as thin films on NaCl plates by dissolving the compound in CH<sub>2</sub>Cl<sub>2</sub> followed by evaporation or as KBr pellets.

### General Procedure for the Formation of DPM Ethers from Alcohols under Thermal Conditions:

Alcohol was placed in a 25 mL flame dried round bottom flask and dissolved in anhydrous toluene to a concentration of 0.25 M. The trichloroacetimidate (1.2 equiv) was added and the reaction warmed to reflux. After 18 hours, the reaction was cooled to room temperature and concentrated under reduced pressure. The residue was pre-adsorbed on silica gel and purified by silica gel column chromatography. In some cases the residue was dissolved in ethyl acetate, washed with 2M aq. NaOH (3x), dried (Na<sub>2</sub>SO<sub>4</sub>) and concentrated (this workup removes the trichloroacetamide byproduct and was used in cases where the trichloroacetamide was difficult to separate chromatographically).

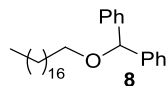

**Octadecyloxydiphenylmethane (8).** White solid (0.273 g, 85%). mp = 47-48 °C; TLC  $R_f$  = 0.80 (10% ethyl acetate/hexanes); IR (thin film from CH<sub>2</sub>Cl<sub>2</sub>) 3027, 2923, 2852, 1493, 1453, 1097 cm<sup>-1</sup>; <sup>1</sup>H NMR (300 MHz, CDCl<sub>3</sub>) δ 7.21-7.37 (m, 10H), 5.33 (s, 1H), 3.44 (t,  $J$  = 6.6 Hz, 2H), 1.60-1.67 (m, 2H), 1.26 (m, 30H), 0.88 (t,  $J$  = 6.3 Hz, 3H); <sup>13</sup>C NMR (75 MHz, CDCl<sub>3</sub>) δ 142.9, 128.5, 127.5, 127.2, 83.8, 69.4, 32.2, 30.1, 29.94, 29.91, 29.87, 29.85, 29.7, 29.6, 26.5, 22.9, 14.3 (several signals in the aliphatic region were not resolved). Anal calcd for C<sub>31</sub>H<sub>48</sub>O: C, 85.26; H, 11.08. Found: C, 85.18; H, 11.13.

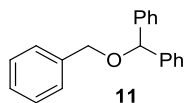

**Benzyloxydiphenylmethane (11).**<sup>2</sup> Clear oil (0.238 g, 94%). TLC  $R_f$  = 0.92 (25% ethyl acetate/hexanes); <sup>1</sup>H NMR (300 MHz, CDCl<sub>3</sub>) δ 7.24-7.42 (m, 15H), 5.46 (s, 1H), 4.56 (s, 2H); <sup>13</sup>C NMR (75 MHz, CDCl<sub>3</sub>) δ 142.4, 138.6, 128.6, 128.6, 127.9, 127.72, 127.65, 127.3, 82.7, 70.7.

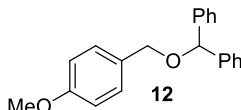

**(4-Methoxybenzyloxy)diphenylmethane (12).**<sup>3</sup> Clear oil (0.314 g, 71%). TLC  $R_f$  = 0.50 (10% ethyl acetate/hexanes); <sup>1</sup>H NMR (300 MHz, CDCl<sub>3</sub>) δ 7.24-7.41 (m, 12H), 6.91 (d,  $J$  = 8.7 Hz, 2H), 5.45 (s, 1H), 4.50 (s, 2H), 3.83 (s, 3H); <sup>13</sup>C NMR (100 MHz, CDCl<sub>3</sub>) δ 159.3, 142.4, 130.6, 129.5, 128.5, 127.6, 127.3, 113.9, 82.2, 70.3, 55.4.

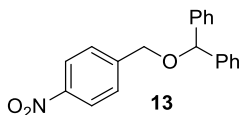

**(((4-Nitrobenzyloxy)methylene)dibenzene (13).** Off-white solid (0.460 g, 88%). mp = 62-64 °C (DCM); TLC  $R_f$  = 0.59 (40% DCM/60% hexanes); IR (thin film from CH<sub>2</sub>Cl<sub>2</sub>) 3062, 3028, 2922, 2857, 1493, 1347, 1288 cm<sup>-1</sup>; <sup>1</sup>H NMR (300 MHz, CDCl<sub>3</sub>) δ 8.19 (d,  $J$  = 8.7 Hz, 2H), 7.52 (d,  $J$  = 8.1 Hz, 2H), 7.25-7.40 (m, 10H), 5.46 (s, 1H), 4.62 (s, 2H); <sup>13</sup>C NMR (75 MHz, CDCl<sub>3</sub>) δ 147.4, 146.1, 141.6, 128.6, 127.8, 127.7, 127.0, 123.6, 83.5, 69.5. Anal calcd for C<sub>20</sub>H<sub>17</sub>NO<sub>3</sub>: C, 77.22; H, 5.37; N, 3.49. Found: C, 77.20; H, 5.31; N, 3.44.

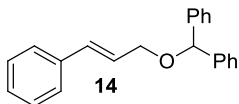

**Cinnamyloxydiphenylmethane (14).**<sup>4</sup> White solid (0.395 g, 88%). mp = 55-57 °C; TLC  $R_f$  = 0.58 (25% ethyl acetate/hexanes);  $^1\text{H}$  NMR (300 MHz,  $\text{CDCl}_3$ )  $\delta$  7.23-7.42 (m, 15H), 6.63 (d,  $J$  = 15.9 Hz, 1H), 6.32-6.41 (m, 1H), 5.51 (s, 1H), 4.20 (dd,  $J$  = 6.0, 1.5 Hz, 2H);  $^{13}\text{C}$  NMR (75 MHz,  $\text{CDCl}_3$ )  $\delta$  142.3, 136.9, 132.3, 128.6, 128.5, 127.7, 127.5, 127.1, 126.6, 126.3, 82.8, 69.4.

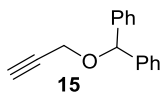

**Diphenyl(prop-2-ynyloxy)methane (15).**<sup>5</sup> Yellow oil (0.384 g, 97%). TLC  $R_f$  = 0.86 (10% ethyl acetate/hexanes);  $^1\text{H}$  NMR (300 MHz,  $\text{CDCl}_3$ )  $\delta$  7.24-7.40 (m, 10H), 5.68 (s, 1H), 4.17 (d,  $J$  = 2.4 Hz, 2H), 2.46 (t,  $J$  = 2.4 Hz, 1H);  $^{13}\text{C}$  NMR (100 MHz,  $\text{CDCl}_3$ )  $\delta$  141.3, 128.6, 127.9, 127.5, 81.8, 79.9, 74.8, 56.0.

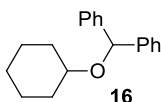

**((Cyclohexyloxy)methylene)dibenzene (16).**<sup>6</sup> Clear oil (0.494 g, 93%). TLC  $R_f$  = 0.68 (10% ethyl acetate/hexanes);  $^1\text{H}$  NMR (300 MHz,  $\text{CDCl}_3$ )  $\delta$  7.24-7.40 (m, 10H), 5.58 (s, 1H), 3.35-3.44 (m, 1H), 1.93 (dd,  $J$  = 9.0, 6.0 Hz, 2H), 1.76-1.82 (m, 2H), 1.41-1.58 (m, 3H), 1.26 (q,  $J$  = 8.3 Hz, 3H);  $^{13}\text{C}$  NMR (75 MHz,  $\text{CDCl}_3$ )  $\delta$  143.3, 128.4, 127.31, 127.26, 80.1, 75.1, 32.5, 26.0, 24.2.

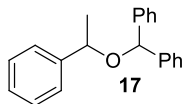

**((1-Phenylethoxy)methylene)dibenzene (17).**<sup>7</sup> Clear oil (0.434 g, 92%). TLC  $R_f$  = 0.85 (10% acetone/hexanes);  $^1\text{H}$  NMR (300 MHz,  $\text{CDCl}_3$ )  $\delta$  7.20-7.41 (m, 15H), 5.31 (s, 1H), 4.51 (q,  $J$  = 6.6 Hz, 1H), 1.53 (d,  $J$  = 6.3 Hz, 3H);  $^{13}\text{C}$  NMR (75 MHz,  $\text{CDCl}_3$ )  $\delta$  143.9, 143.0, 142.2, 128.7, 128.4, 128.3, 127.73, 127.70, 127.67, 127.3, 127.1, 126.7, 80.2, 75.1, 24.5.

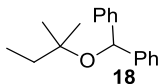

**((tert-Pentyloxy)methylene)dibenzene (18).**<sup>8</sup> Clear oil (0.489 g, 85%). TLC  $R_f$  = 0.92 (10% ethyl acetate/hexanes);  $^1\text{H}$  NMR (300 MHz,  $\text{CDCl}_3$ )  $\delta$  7.41 (d,  $J$  = 6.9 Hz, 4H), 7.33 (t,  $J$  = 7.2 Hz, 4H), 7.20-7.26 (m, 2H), 5.60 (s, 1H), 1.62 (q,  $J$  = 7.5 Hz, 2H), 1.17 (s, 6H), 0.91 (t,  $J$  = 7.5 Hz, 3H);  $^{13}\text{C}$  NMR (100 MHz,  $\text{CDCl}_3$ )  $\delta$  145.6, 128.3, 127.0, 126.9, 76.9, 75.6, 34.8, 26.1, 8.9.

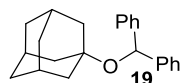

**1-(Benzhydryloxy)adamantane (19).** Orange solid (0.383 g, 92%). mp = 64-66 °C; TLC  $R_f$  = 0.71 (10% ethyl acetate/hexanes); IR (thin film from  $\text{CH}_2\text{Cl}_2$ ) 3025, 2905, 2850, 1492, 1451, 1354, 1082  $\text{cm}^{-1}$ ;  $^1\text{H}$  NMR (300 MHz,  $\text{CDCl}_3$ )  $\delta$  7.20-7.39 (m, 10H), 5.80 (s, 1H), 2.14 (s, 3H), 1.83 (bs, 6H), 1.62 (bs, 6H);  $^{13}\text{C}$  NMR (100 MHz,  $\text{CDCl}_3$ )  $\delta$  145.3, 128.2, 127.2, 126.9, 74.4, 73.8, 43.0, 36.6, 30.8. Anal calcd for  $\text{C}_{23}\text{H}_{26}\text{O}$ : C, 86.75; H, 8.23. Found: C, 86.72; H, 8.18.

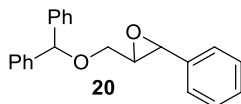

**2-((Benzhydryloxy)methyl)-3-phenyloxirane (20).**<sup>9</sup> Clear oil (0.255 g, 65%) TLC  $R_f$  = 0.50 (10% ethyl acetate/hexanes);  $^1\text{H}$  NMR (300 MHz,  $\text{CDCl}_3$ )  $\delta$  7.25-7.44 (m, 15H), 5.53 (s, 1H), 3.86 (dd,  $J$  =

11.5, 3.1 Hz, 1H), 3.80 (d,  $J = 2.0$  Hz, 1H) 3.66 (dd,  $J = 5.3, 11.5$  Hz, 1H), 3.29-3.32 (m, 1H).  $^{13}\text{C}$  NMR (100 MHz,  $\text{CDCl}_3$ )  $\delta$  141.99, 141.94, 137.1, 128.7, 128.6, 128.4, 127.8, 127.77, 127.5, 127.3, 127.2, 125.9, 84.1, 68.9, 61.4, 56.1.

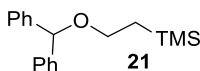

**(2-(Benzhydryloxy)ethyl)trimethylsilane (21).** Pale yellow oil (0.368 g, 79%). TLC  $R_f = 0.56$  (15%  $\text{DCM}/5\%$  triethylamine/ 80% hexanes); IR (thin film from  $\text{CH}_2\text{Cl}_2$ ) 3087, 3063, 3029, 2953, 2892, 1452, 1317, 1249  $\text{cm}^{-1}$ ;  $^1\text{H}$  NMR (400 MHz,  $\text{CDCl}_3$ )  $\delta$  7.36 (dd,  $J = 6.3, 1.2$  Hz, 4H), 7.30 (t,  $J = 6.6$  Hz, 4H), 7.22-7.25 (m, 2H), 5.35 (s, 1H), 3.56 (t,  $J = 6.0$  Hz, 2H), 1.03 (t,  $J = 6.0$  Hz, 2H), 0.00 (s, 9H);  $^{13}\text{C}$  NMR (100 MHz,  $\text{CDCl}_3$ )  $\delta$  144.0, 129.6, 128.5, 128.2, 84.6, 67.6, 19.7, 0.0; Anal calcd for  $\text{C}_{18}\text{H}_{24}\text{OSi}$ : C, 76.00; H, 8.50; Found: C, 75.77; H, 8.62.

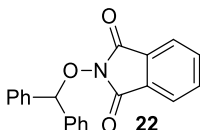

**2-(Benzhydryloxy)isoindoline-1,3-dione (22).**<sup>10</sup> Yellow solid (0.323 g, 80%). mp = 160-162  $^\circ\text{C}$ ; TLC  $R_f = 0.29$  (10% acetone/hexanes);  $^1\text{H}$  NMR (300 MHz,  $\text{CDCl}_3$ )  $\delta$  7.66-7.76 (m, 4H), 7.52-7.56 (m, 4H), 7.29-7.39 (m, 6H), 6.53 (s, 1H);  $^{13}\text{C}$  NMR (100 MHz,  $\text{CDCl}_3$ )  $\delta$  163.8, 137.9, 134.4, 128.9, 128.8, 128.5, 128.4, 123.4, 89.7.

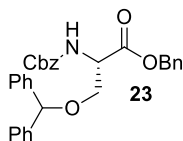

**(S)-Benzyl 3-(benzhydryloxy)-2-(((benzyloxy)carbonyl)amino)propanoate (23).** Clear oil (0.273 g, 91%).  $[\alpha]_D^{21.6} -12.5$  ( $c$  1.26,  $\text{CHCl}_3$ ); TLC  $R_f = 0.18$  (10% ethyl acetate/hexanes); IR (thin film from  $\text{CH}_2\text{Cl}_2$ ) 3434, 3341, 3062, 3030, 2949, 2876, 1722, 1498, 1339, 1197, 1067  $\text{cm}^{-1}$ ;  $^1\text{H}$  NMR (400 MHz,  $\text{CDCl}_3$ )  $\delta$  7.07-7.30 (m, 20H), 5.63 (d,  $J = 12.0$  Hz, 1H), 5.19 (s, 1H), 5.12 (d,  $J = 4.0$  Hz, 2H), 5.04 (s, 2H), 4.49 (dt,  $J = 2.8$  Hz, 1H), 3.84 (dd,  $J = 9.4, 2.8$  Hz, 1H), 3.60 (dd,  $J = 9.4, 3.1$  Hz, 1H);  $^{13}\text{C}$  NMR (75 MHz,  $\text{CDCl}_3$ )  $\delta$  170.3, 156.1, 141.6, 141.4, 136.4, 135.4, 128.7, 128.65, 128.6, 128.5, 128.4, 128.3, 128.2, 127.7, 127.0, 126.9, 84.2, 69.0, 67.4, 67.2, 54.8. (note: two signals in the aromatic region were not resolved.) Anal calcd for  $\text{C}_{31}\text{H}_{29}\text{NO}_5$ : C, 75.13; H, 5.90; N, 2.83. Found: C, 74.94; H, 5.97; N, 3.00. Chiral HPLC analysis: Chiralcel OD (heptane/2-PrOH = 90/10, 1.0 mL/min, 254 nm, 25  $^\circ\text{C}$ ):  $t_{(S \text{ enantiomer})} = 16.7$  min,  $t_{(R \text{ enantiomer})} = 23.9$  min.

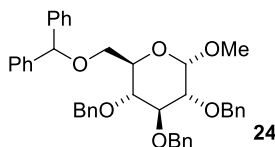

**Methyl 2,3,4-Tri-O-benzyl-6-O-diphenylmethyl- $\alpha$ -D-glucopyranoside (24).**<sup>11</sup> Clear colored oil (0.750 g, 73%). TLC  $R_f = 0.43$  (15% ethyl acetate/85% hexanes);  $^1\text{H}$  NMR (300 MHz,  $\text{CDCl}_3$ )  $\delta$  7.55-7.18 (m, 25 H), 5.50 (s, 1H), 5.13 (d,  $J = 10.8$  Hz, 1H), 4.98 (t,  $J = 11.1$  Hz, 2H), 4.93 (d,  $J = 12.0$  Hz, 1H), 4.82 (d,  $J = 11.7$  Hz, 1H), 4.80 (d,  $J = 3.6$  Hz, 1H), 4.68 (d,  $J = 11.1$  Hz, 1H), 4.16 (t,  $J = 9.3$  Hz, 1H), 3.89-3.99 (m, 1H), 3.77-3.84 (m, 3H), 3.72 (dd,  $J = 3.6, 9.6$  Hz, 1H), 3.49 (s, 3H);  $^{13}\text{C}$  NMR (75 MHz,  $\text{CDCl}_3$ )  $\delta$  142.2, 142.1, 138.8, 138.3, 138.2, 128.5, 128.4, 128.36, 128.1, 127.9, 127.8, 127.7, 127.5, 127.4, 127.2, 126.9, 98.1, 84.1, 82.3, 80.1, 78.0, 75.9, 75.1, 73.4, 70.3, 67.9, 55.1.

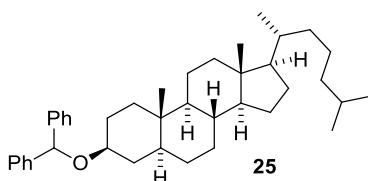

**(3S,5S,8R,9S,10S,13R,14S,17R)-3-(Benzhydryloxy)-10,13-dimethyl-17-((R)-6-methylheptan-2-yl)hexadecahydro-1H-cyclopenta[a]phenanthrene (25).** White solid (0.374 g, 87%).  $[\alpha]_D^{21.6} +12.4$  (*c* 1.04, CHCl<sub>3</sub>); mp = 127-129 °C; TLC  $R_f = 0.74$  (10% ethyl acetate/hexanes); IR (thin film from CH<sub>2</sub>Cl<sub>2</sub>) 3027, 2930, 2865, 1493, 1452, 1381, 1062 cm<sup>-1</sup>; <sup>1</sup>H NMR (300 MHz, CDCl<sub>3</sub>) δ 7.16-7.34 (m, 10H), 5.54 (s, 1H), 3.28-3.38 (m, 1H), 0.63-1.92 (m, 46H); <sup>13</sup>C NMR (75 MHz, CDCl<sub>3</sub>) δ 143.3, 128.4, 127.4, 127.3, 80.3, 76.5, 56.7, 56.5, 54.6, 45.0, 42.8, 40.3, 39.7, 37.2, 36.4, 36.0, 35.95, 35.7, 35.3, 32.3, 29.1, 28.7, 28.5, 28.2, 24.4, 24.0, 23.0, 22.8, 21.4, 18.9, 12.5, 12.3. Anal calcd for C<sub>40</sub>H<sub>58</sub>O: C, 86.58; H, 10.54. Found: C, 86.59; H, 10.68.

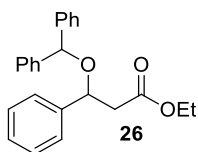

**Ethyl 3-(benzhydryloxy)-3-phenylpropanoate (26).** White solid (0.178 g, 96%). mp = 73-74 °C; TLC  $R_f = 0.53$  (10% ethyl acetate/hexanes); IR (thin film from CH<sub>2</sub>Cl<sub>2</sub>) 3061, 3028, 2980, 1736, 1493, 1453, 1268, 1172, 1052 cm<sup>-1</sup>; <sup>1</sup>H NMR (300 MHz, CDCl<sub>3</sub>) δ 7.19-7.40 (m, 15H), 5.24 (s, 1H), 4.81 (ddd, *J* = 1.3, 4.9, 9.0 Hz, 1H), 4.00-4.23 (m, 2H), 2.96 (ddd, *J* = 1.4, 9.0, 14.7 Hz, 1H), 2.65 (ddd, *J* = 1.2, 4.9, 14.7 Hz, 1H), 1.21 (td, *J* = 1.1, 7.1 Hz, 3H); <sup>13</sup>C NMR (100 MHz, CDCl<sub>3</sub>) δ 170.8, 142.8, 141.3, 140.7, 128.8, 128.6, 128.3, 128.2, 128.0, 127.9, 127.24, 127.16, 126.7, 80.11, 75.7, 60.6, 44.0, 14.3. Anal calcd for C<sub>24</sub>H<sub>24</sub>O<sub>3</sub>: C, 79.97; H, 6.71. Found: C, 79.96; H, 6.88.

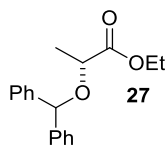

**(R)-Ethyl 2-(benzhydryloxy)propanoate (27).** Clear oil (0.434 g, 90%).  $[\alpha]_D^{21.6} -103.8$  (*c* 1.04, DCM); TLC  $R_f = 0.57$  (10% ethyl acetate/hexanes); <sup>1</sup>H NMR (300 MHz, CDCl<sub>3</sub>) δ 7.26-7.41 (m, 10H), 5.57 (s, 1H), 4.16-4.28 (m, 2H), 4.08 (q, *J* = 6.0 Hz, 1H), 1.49 (d, *J* = 9.0 Hz, 3H), 1.30 (t, *J* = 9.0 Hz, 3H); <sup>13</sup>C NMR (100 MHz, CDCl<sub>3</sub>) δ 173.6, 142.1, 141.1, 128.7, 128.4, 128.0, 127.7, 127.6, 127.5, 82.8, 72.7, 61.0, 19.0, 14.4. Chiral HPLC analysis: Chiralcel OD (heptane/2-PrOH = 99/1, 1.0 mL/min, 254 nm, 25 °C):  $t_{(R \text{ enantiomer})} = 5.3$  min,  $t_{(S \text{ enantiomer})} = 5.8$  min.

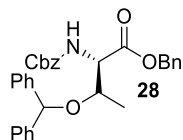

**(3S)-Benzyl 3-(benzhydryloxy)-2-(((benzyloxy)carbonyl)amino)butanoate (28).** Clear oil (0.249 g, 84%).  $[\alpha]_D^{21.6} -27.0$  (*c* 0.94, CH<sub>3</sub>Cl); TLC  $R_f = 0.25$  (10% ethyl acetate/hexanes); IR (thin film from CH<sub>2</sub>Cl<sub>2</sub>) 3440, 3062, 3030, 2976, 1724, 1497, 1453, 1319, 1203 cm<sup>-1</sup>; <sup>1</sup>H NMR (400 MHz, CDCl<sub>3</sub>) δ 7.21-7.41 (m, 20H), 5.70 (d, *J* = 12.0 Hz, 1H), 5.39 (s, 1H), 5.20 (d, *J* = 12.0 Hz, 1H), 5.14-5.20 (m, 2H), 4.95 (d, *J* = 12.0 Hz, 1H), 4.44 (dd, *J* = 9.8, 1.9 Hz, 1H), 4.21 (ddd, *J* = 12.5, 6.2, 1.9 Hz, 1H), 1.27 (d, *J* = 4.0 Hz, 3H); <sup>13</sup>C NMR (75 MHz, CDCl<sub>3</sub>) δ 170.8, 157.0, 142.5, 141.5, 136.4, 135.3, 129.2, 128.7, 128.6, 128.5, 128.43, 128.38, 128.3, 128.0, 127.6, 127.5, 126.8, 125.5, 81.2, 72.7, 67.5, 67.4, 59.3, 16.8. Anal calcd for C<sub>32</sub>H<sub>31</sub>NO<sub>5</sub>: C, 75.42; H, 6.13; N, 2.75. Found: C, 75.16; H, 5.86; N, 2.79.

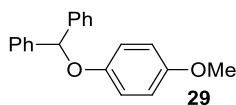

**((4-Methoxyphenoxy)methylene)dibenzene (29).**<sup>13</sup> Orange solid (0.424 g, 91%). mp = 84-85 °C; TLC  $R_f$  = 0.42 (10% acetone/hexanes);  $^1\text{H}$  NMR (300 MHz,  $\text{CDCl}_3$ )  $\delta$  7.26-7.43 (m, 10H), 6.88 (d,  $J$  = 9.1 Hz, 2H), 6.75 (d,  $J$  = 9.2 Hz, 2H), 6.11 (s, 1H), 3.73 (s, 3H).  $^{13}\text{C}$  NMR (100 MHz,  $\text{CDCl}_3$ )  $\delta$  154.2, 152.4, 141.7, 128.7, 127.8, 127.1, 117.4, 114.7, 82.8, 55.7.

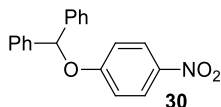

**((4-Nitrophenoxy)methylene)dibenzene (30).**<sup>14</sup> Pale yellow colored solid (0.310 g, 61%). mp = 157-158 °C; TLC  $R_f$  = 0.36 (10% ethyl acetate/90% hexanes);  $^1\text{H}$  NMR (300 MHz,  $\text{CDCl}_3$ )  $\delta$  8.13 (d,  $J$  = 9.0 Hz, 2H), 7.28-7.42 (m, 10H), 7.02 (d,  $J$  = 9.3 Hz, 2H), 6.31 (s, 1H);  $^{13}\text{C}$  NMR (75 MHz,  $\text{CDCl}_3$ )  $\delta$  162.9, 141.6, 139.8, 128.8, 128.3, 126.7, 125.8, 115.9, 82.5.

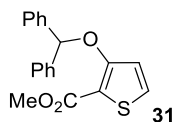

**Methyl 3-(benzhydryloxy)thiophene-2-carboxylate (31).** White solid, (0.280 g, 53%). mp = 105-106 °C; TLC  $R_f$  = 0.3 (10% ethyl acetate/90% hexanes); IR (thin film from  $\text{CH}_2\text{Cl}_2$ ) 3061, 3028, 2948, 1711, 1538, 1228, 1062  $\text{cm}^{-1}$ ;  $^1\text{H}$  NMR (400 MHz,  $\text{CDCl}_3$ )  $\delta$  7.53 (d,  $J$  = 7.6 Hz, 4H), 7.35 (t,  $J$  = 7.2 Hz, 4H), 7.25-7.28 (m, 3H), 6.74 (d,  $J$  = 5.6 Hz, 1H), 6.27 (s, 1H), 3.90 (s, 3H).  $^{13}\text{C}$  NMR (100 MHz,  $\text{CDCl}_3$ )  $\delta$  162.4, 160.1, 141.2, 130.4, 128.9, 128.1, 126.7, 118.7, 111.6, 85.0, 51.8. Anal calcd for  $\text{C}_{19}\text{H}_{16}\text{O}_3\text{S}$ : C, 70.35; H, 4.97; Found: C, 70.26; H, 5.02.

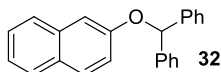

**2-(Benzhydryloxy)naphthalene (32).**<sup>15</sup> Brown oil (0.317 g, 74%) TLC  $R_f$  = 0.32 (10% ethyl acetate/hexanes);  $^1\text{H}$  NMR (400 MHz,  $\text{CDCl}_3$ )  $\delta$  8.10 (d,  $J$  = 8.6 Hz, 1H), 7.87 (d,  $J$  = 8.0 Hz, 1H), 7.82 (d,  $J$  = 8.8 Hz, 1H), 7.47-7.51 (m, 1H), 7.33-7.43 (m, 11H), 7.17 (d,  $J$  = 8.8 Hz, 1H), 6.53 (s, 1H), 5.35 (s, 1H).  $^{13}\text{C}$  NMR (100 MHz,  $\text{CDCl}_3$ )  $\delta$  153.0, 141.8, 133.6, 129.9, 129.8, 129.3, 129.2, 128.9, 127.4, 127.0, 123.4, 123.0, 120.4, 120.0, 48.7.

Octadecyloxydiphenylmethane

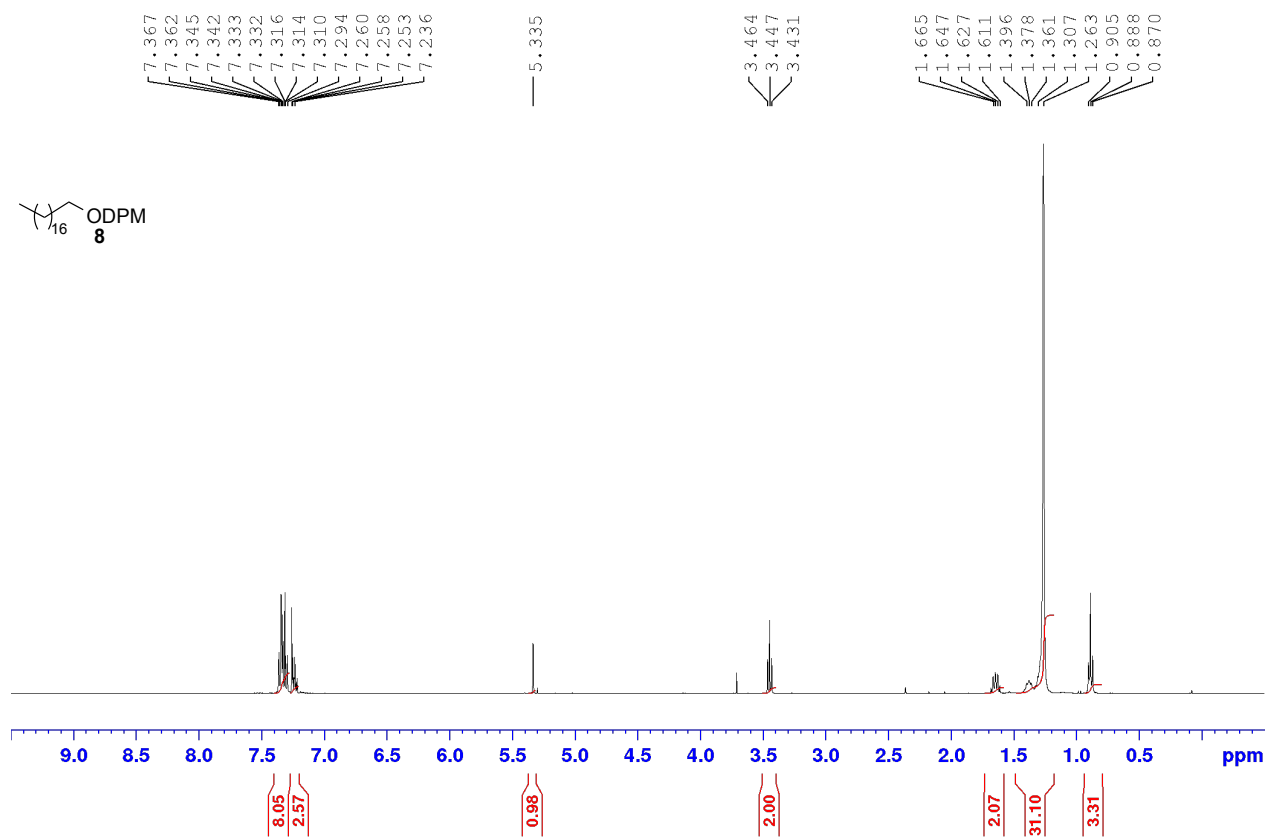

Octadecyloxydiphenylmethane

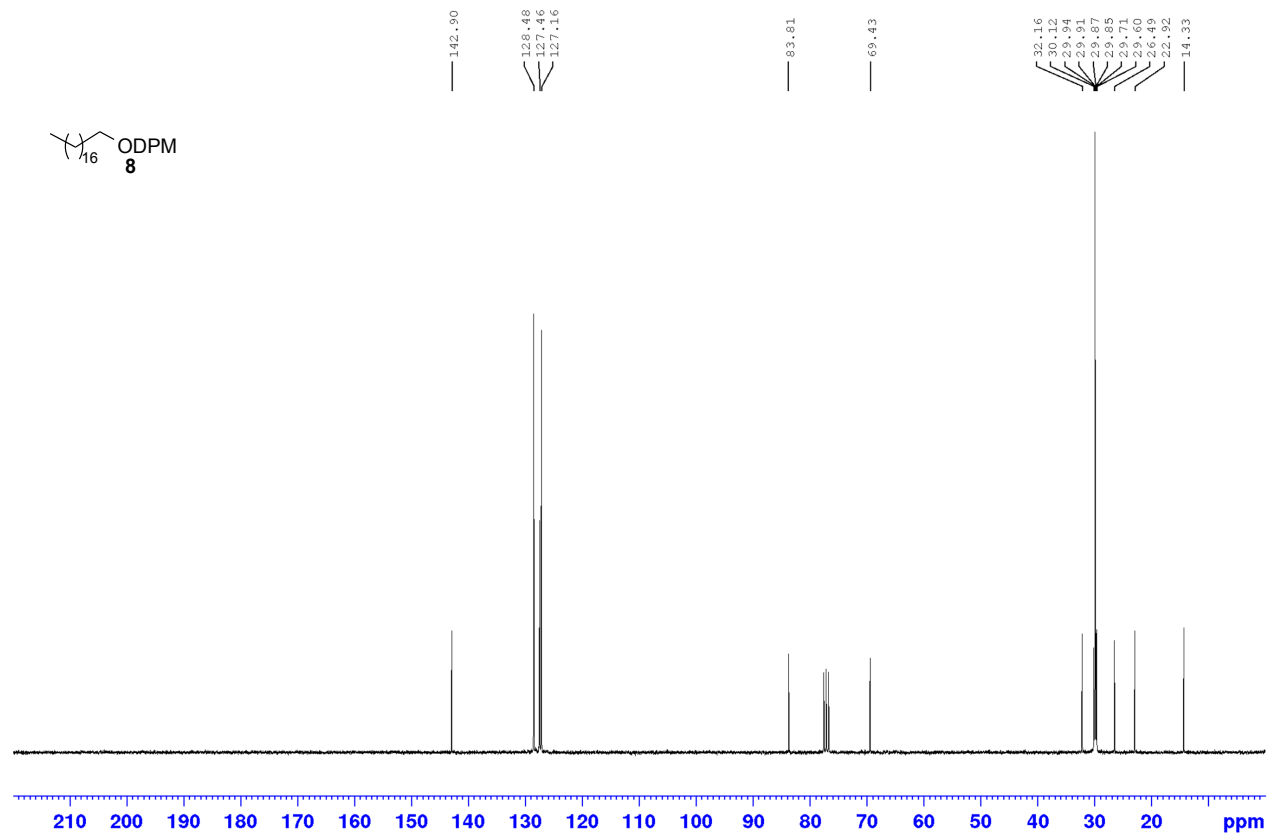



Benzyloxydiphenylmethane

7.386  
7.381  
7.375  
7.374  
7.369  
7.365  
7.360  
7.353  
7.348  
7.345  
7.342  
7.336  
7.326  
7.322  
7.317  
7.310  
7.301  
7.295  
7.289  
7.283  
7.275  
7.266  
7.260  
7.256  
7.248  
7.242  
7.237  
5.462  
4.624  
4.561

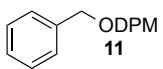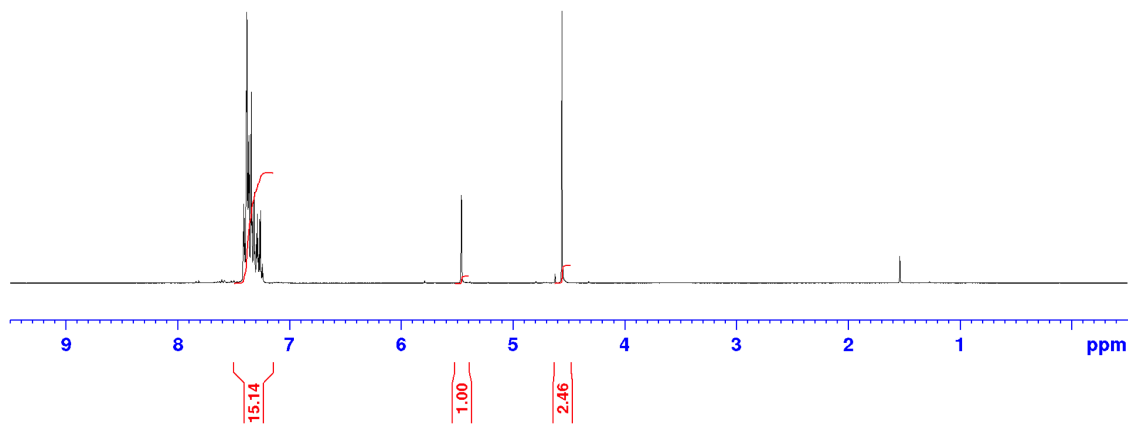

142.35  
138.60  
128.59  
128.58  
127.92  
127.65  
127.33  
82.67  
70.68

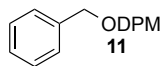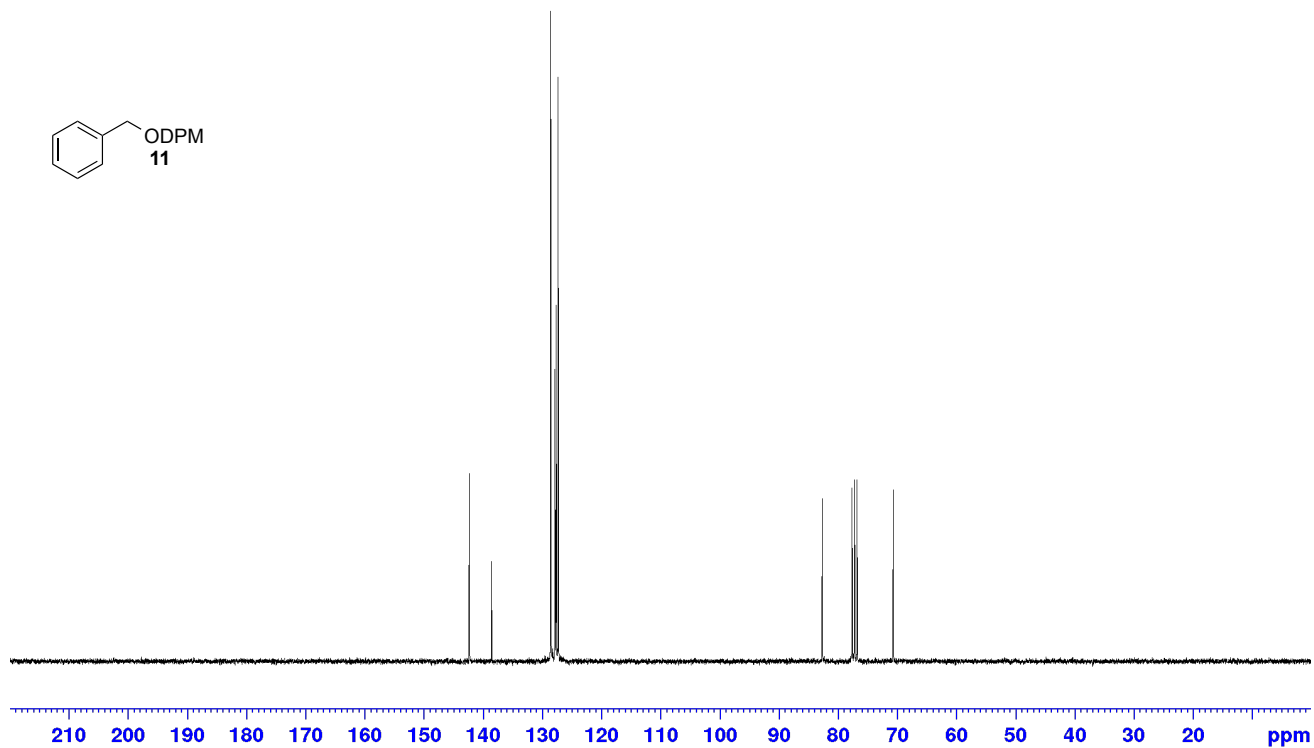

(4-Methoxybenzyloxy) diphenylmethane

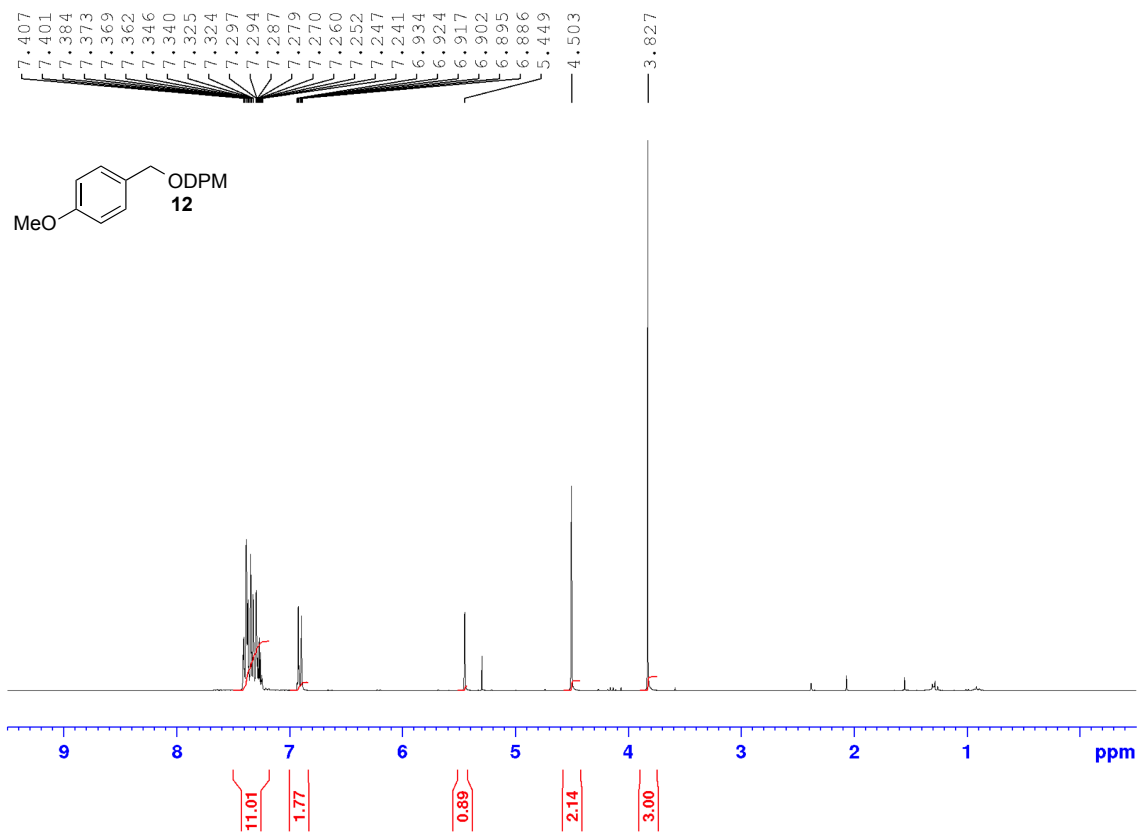

(4-Methoxybenzyloxy) diphenylmethane

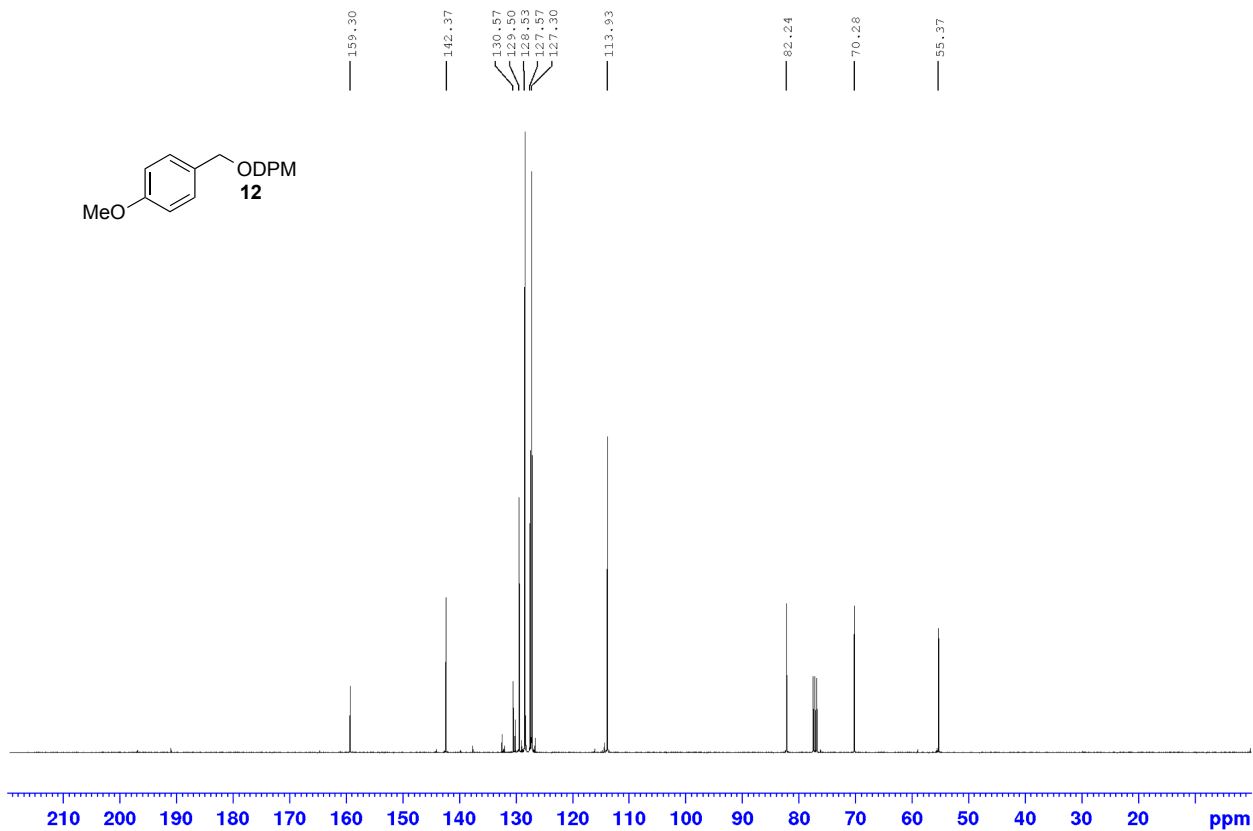

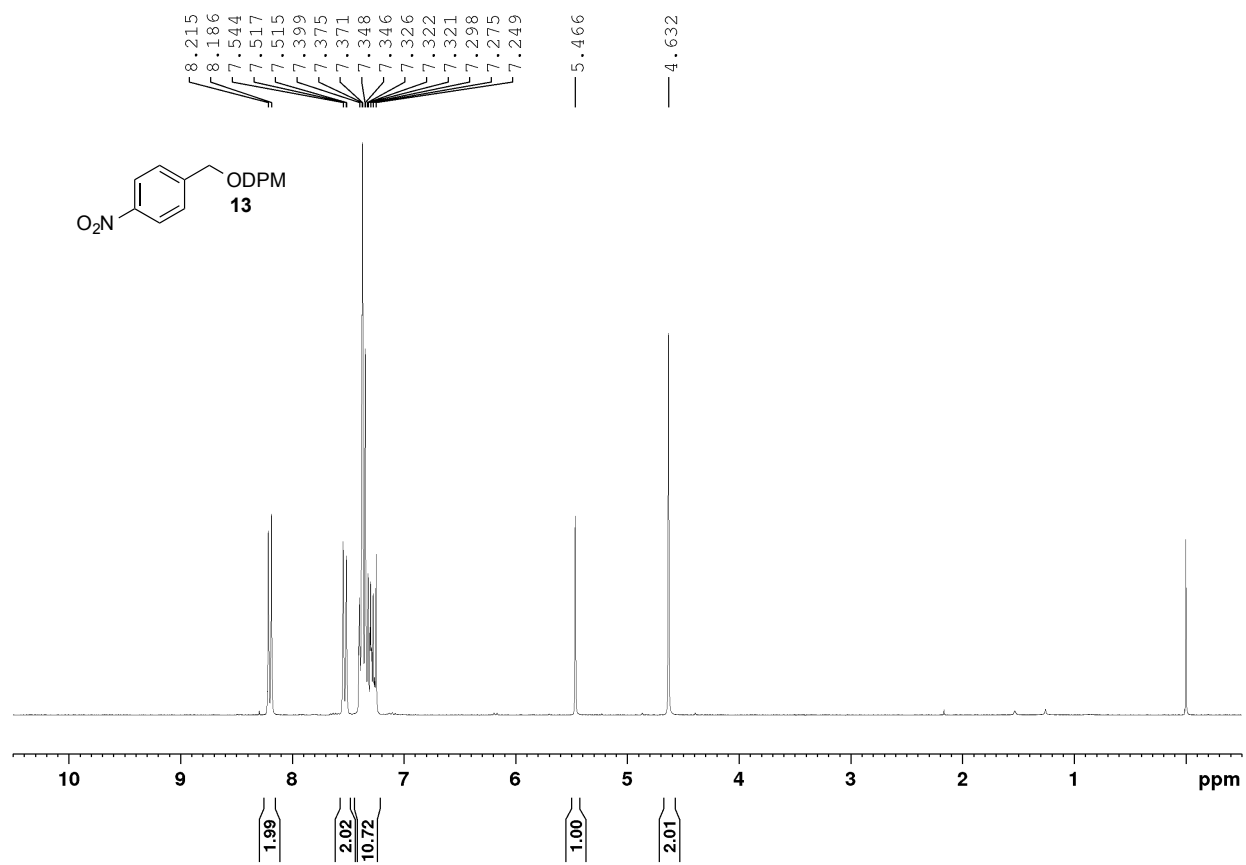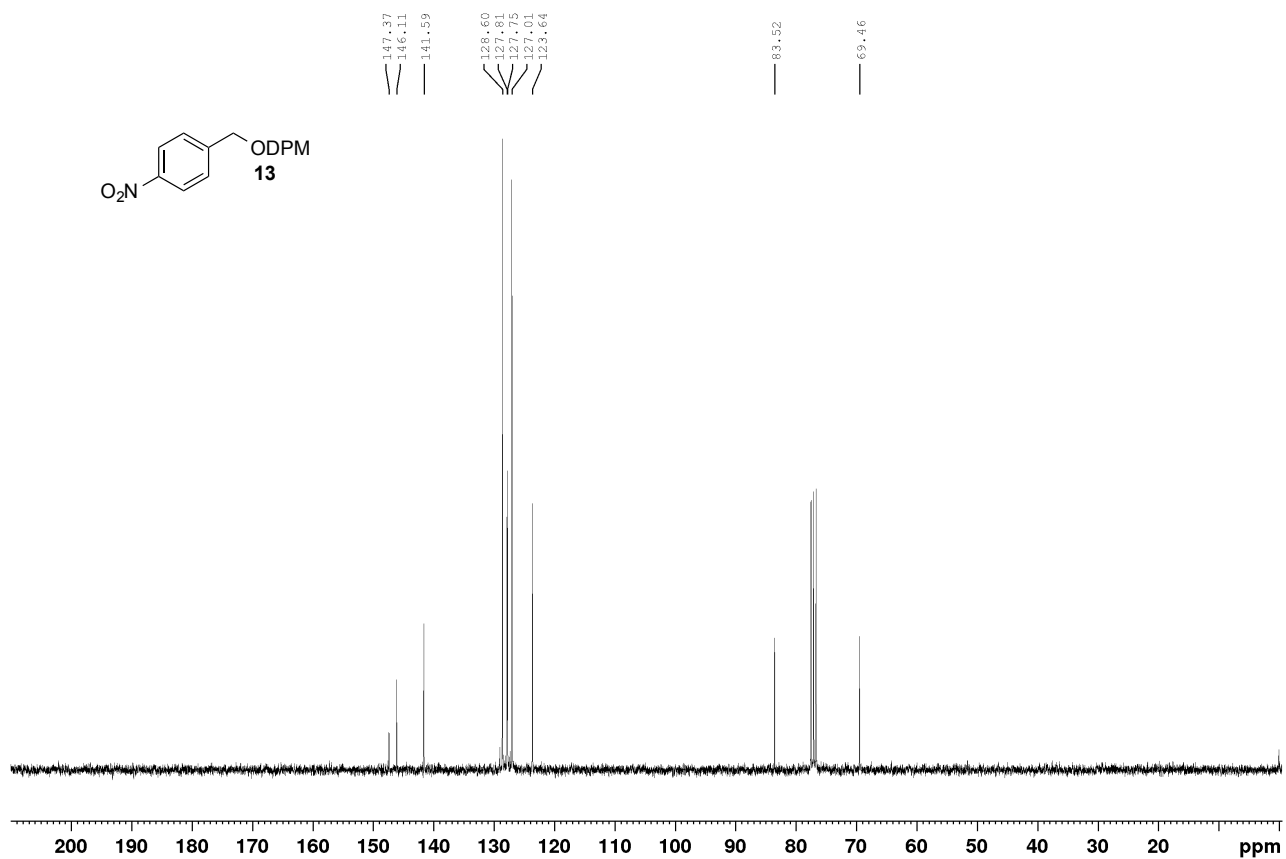

Cinnamyloxydiphenylmethane

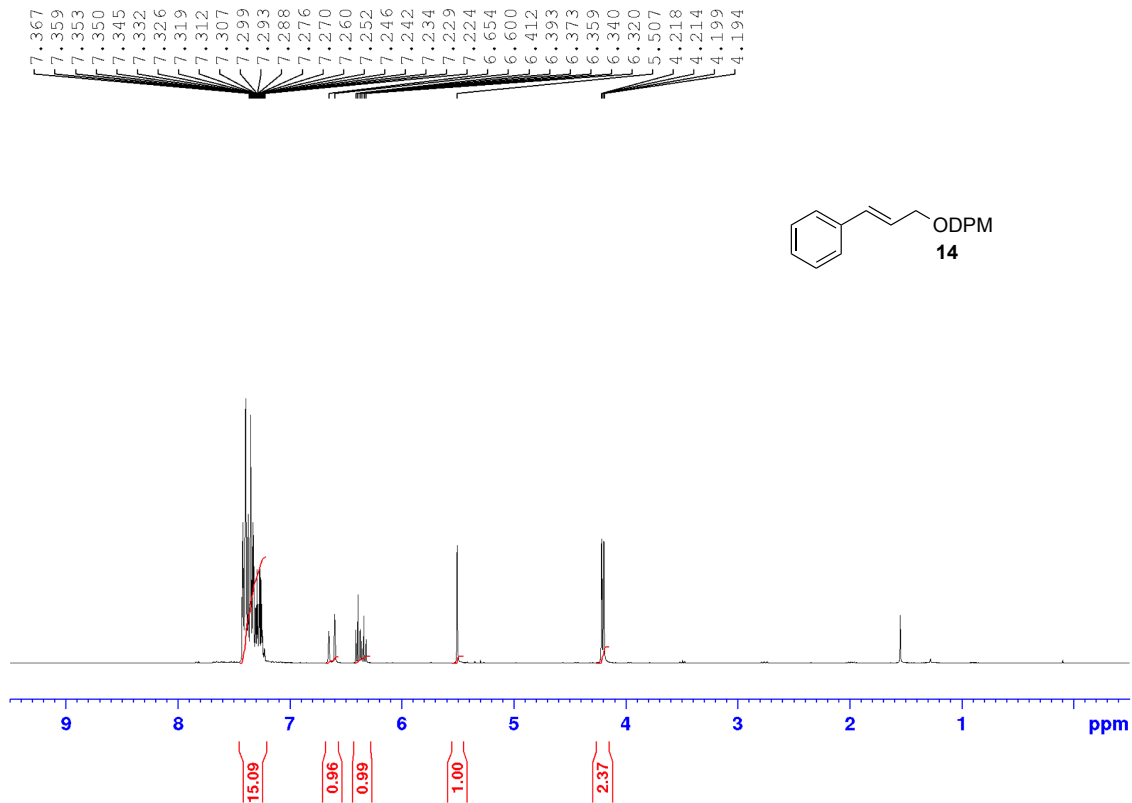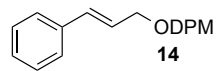

Cinnamyloxydiphenylmethane

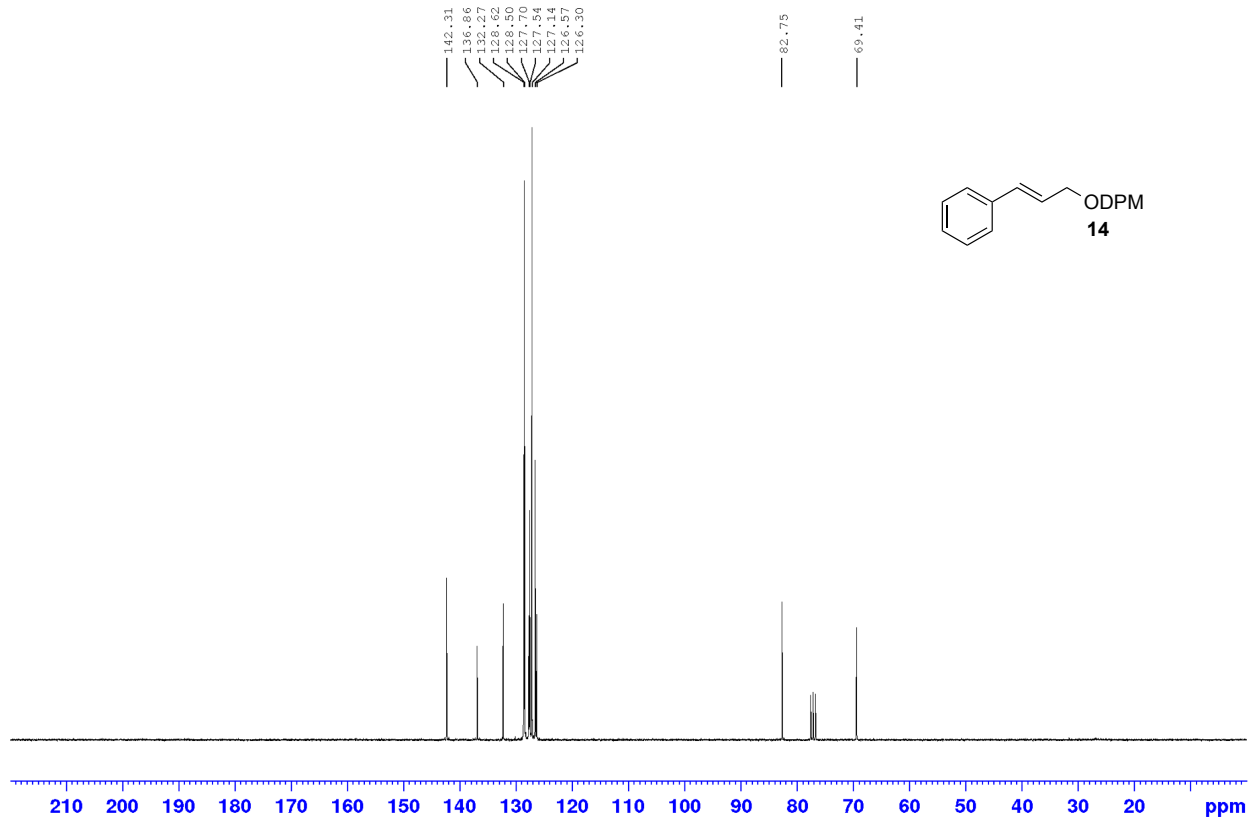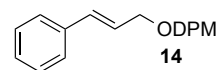

Diphenyl (prop-2-ynyloxy) methane

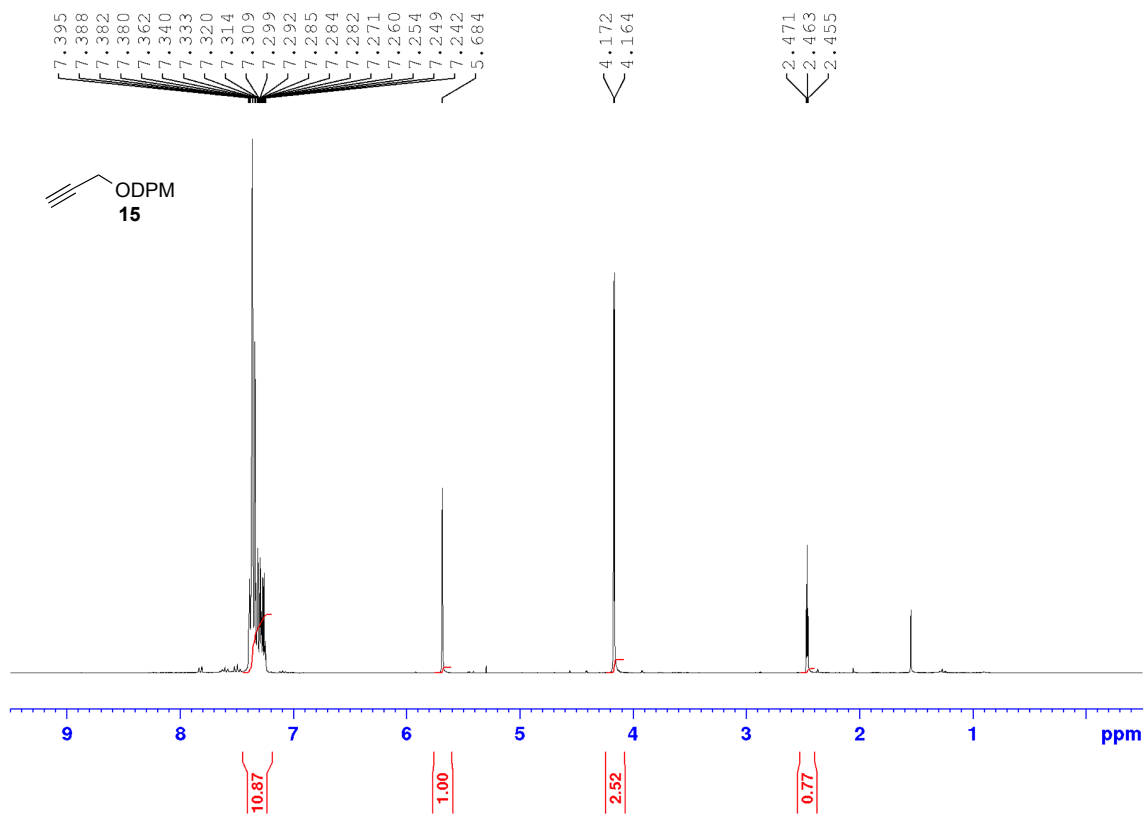

Diphenyl (prop-2-ynyloxy) methane

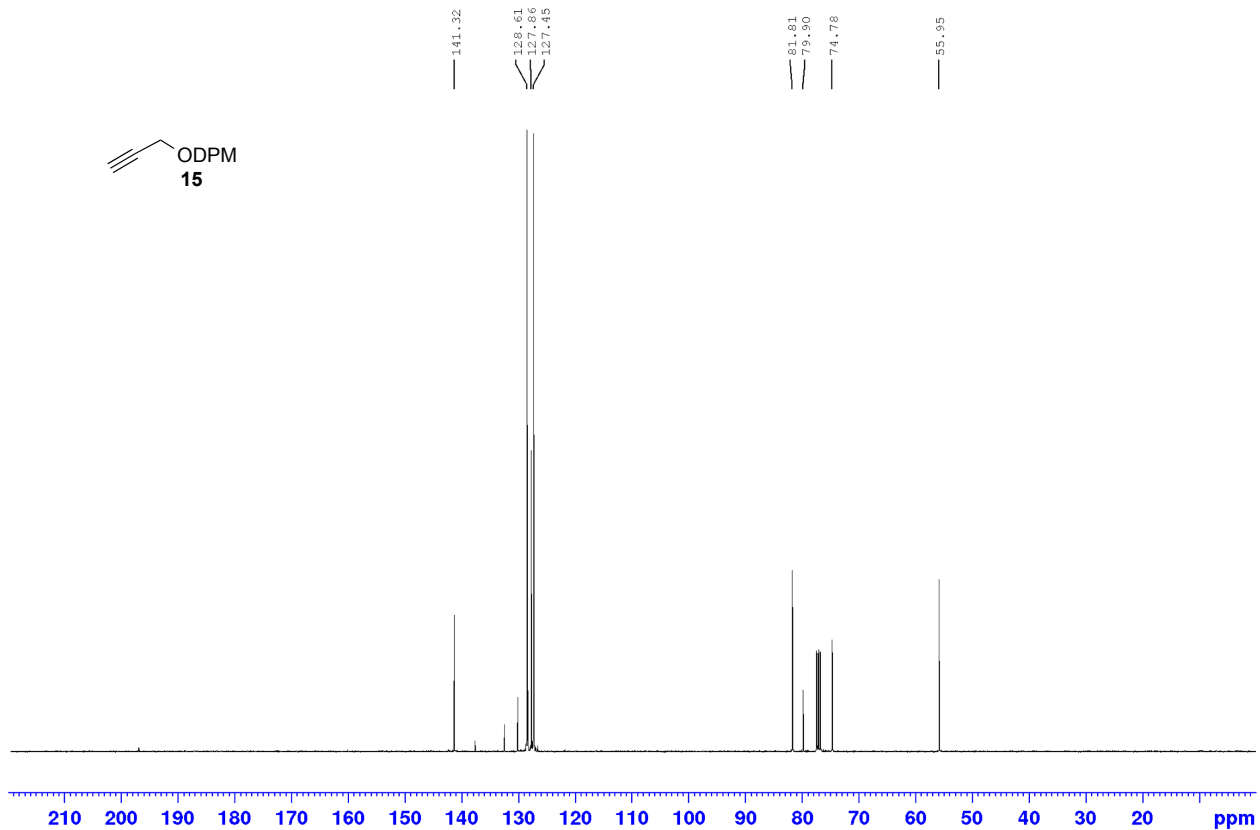

((Cyclohexyloxy)methylene) dibenzene

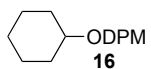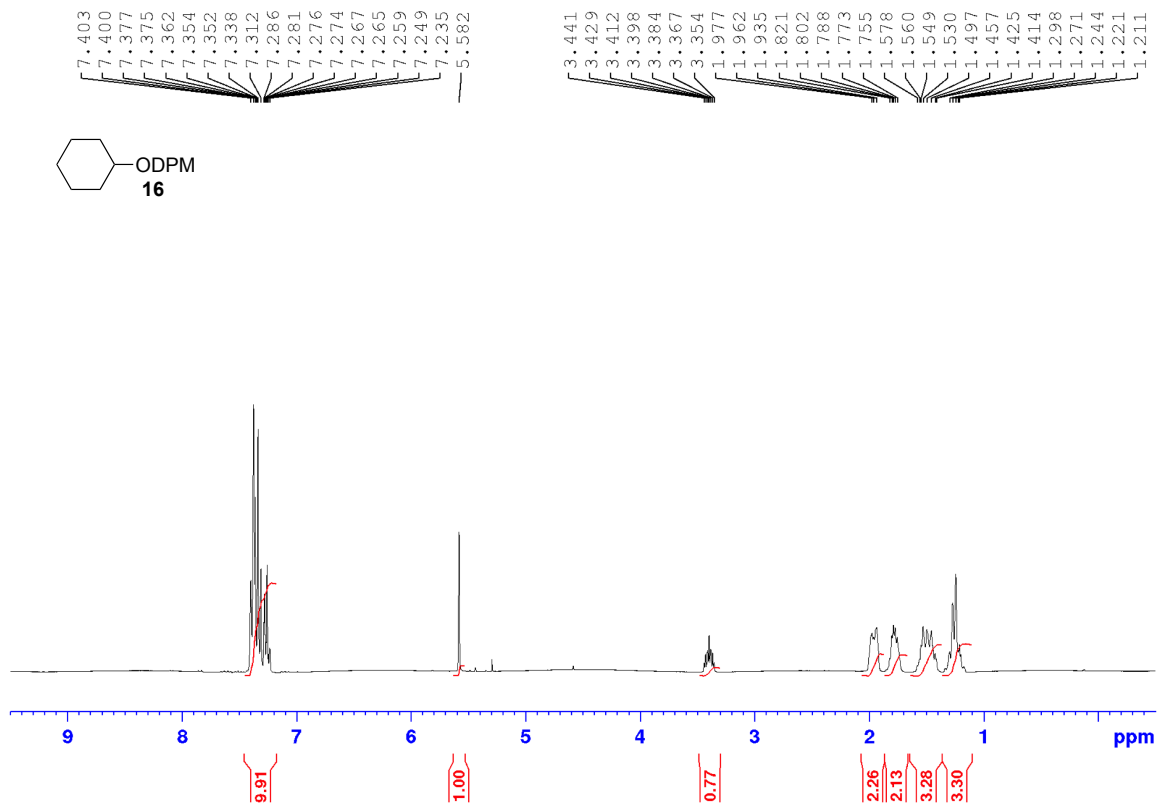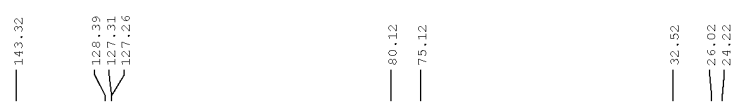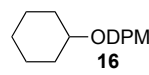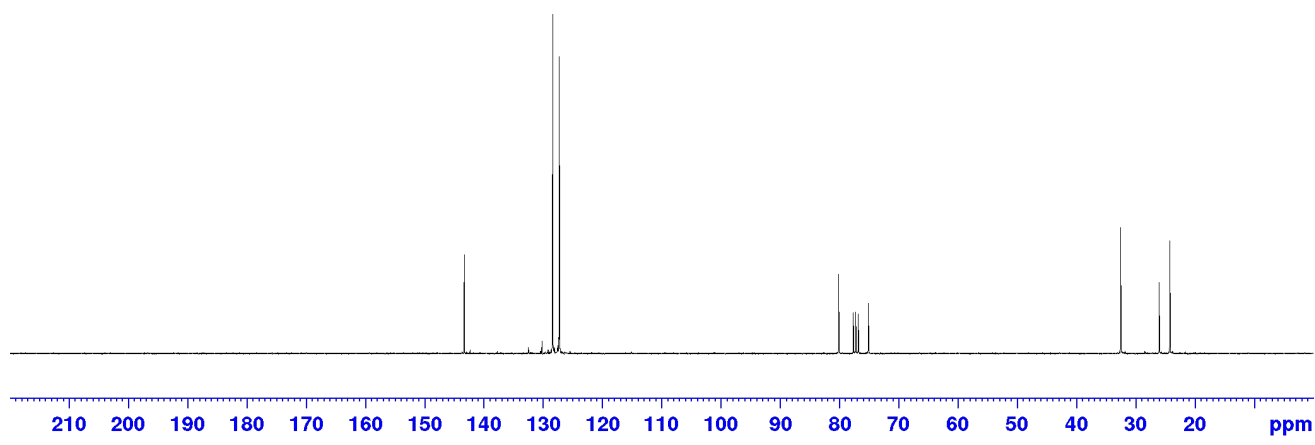

((1-Phenylethoxy)methylene)dibenzene

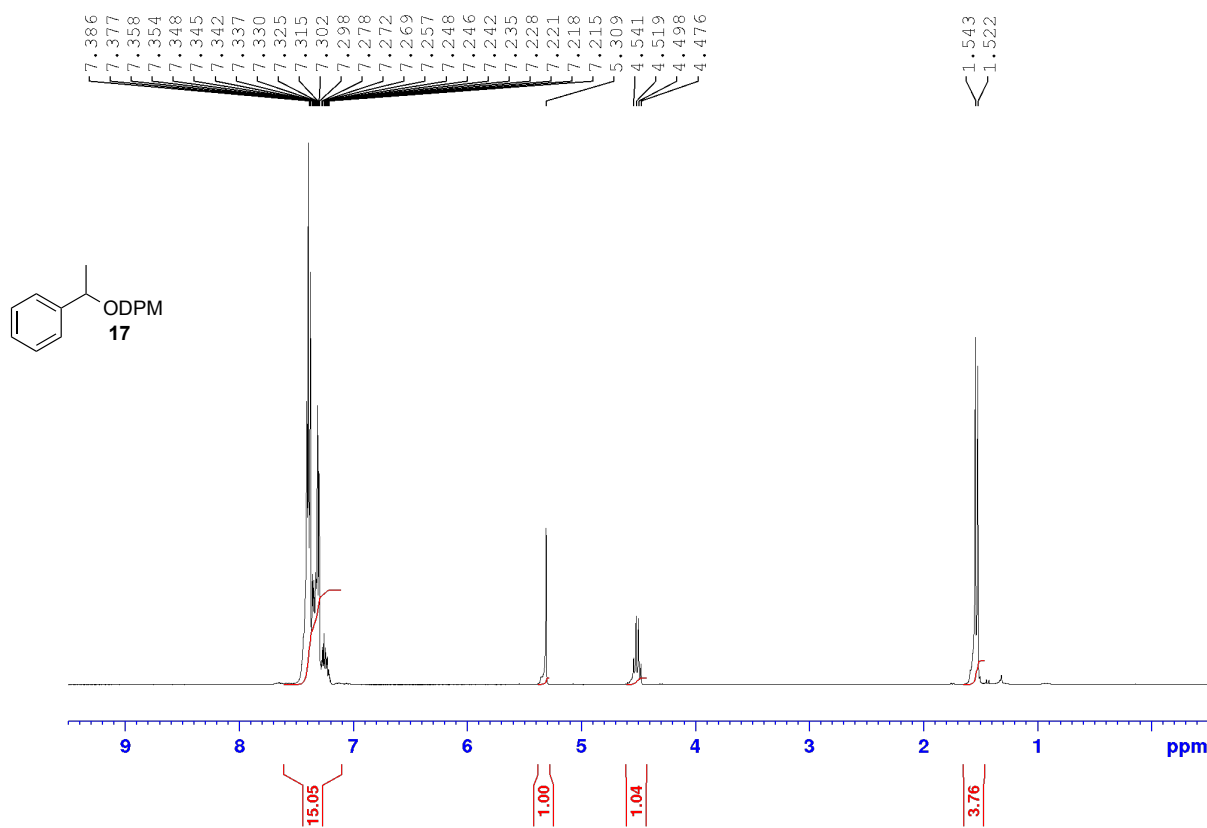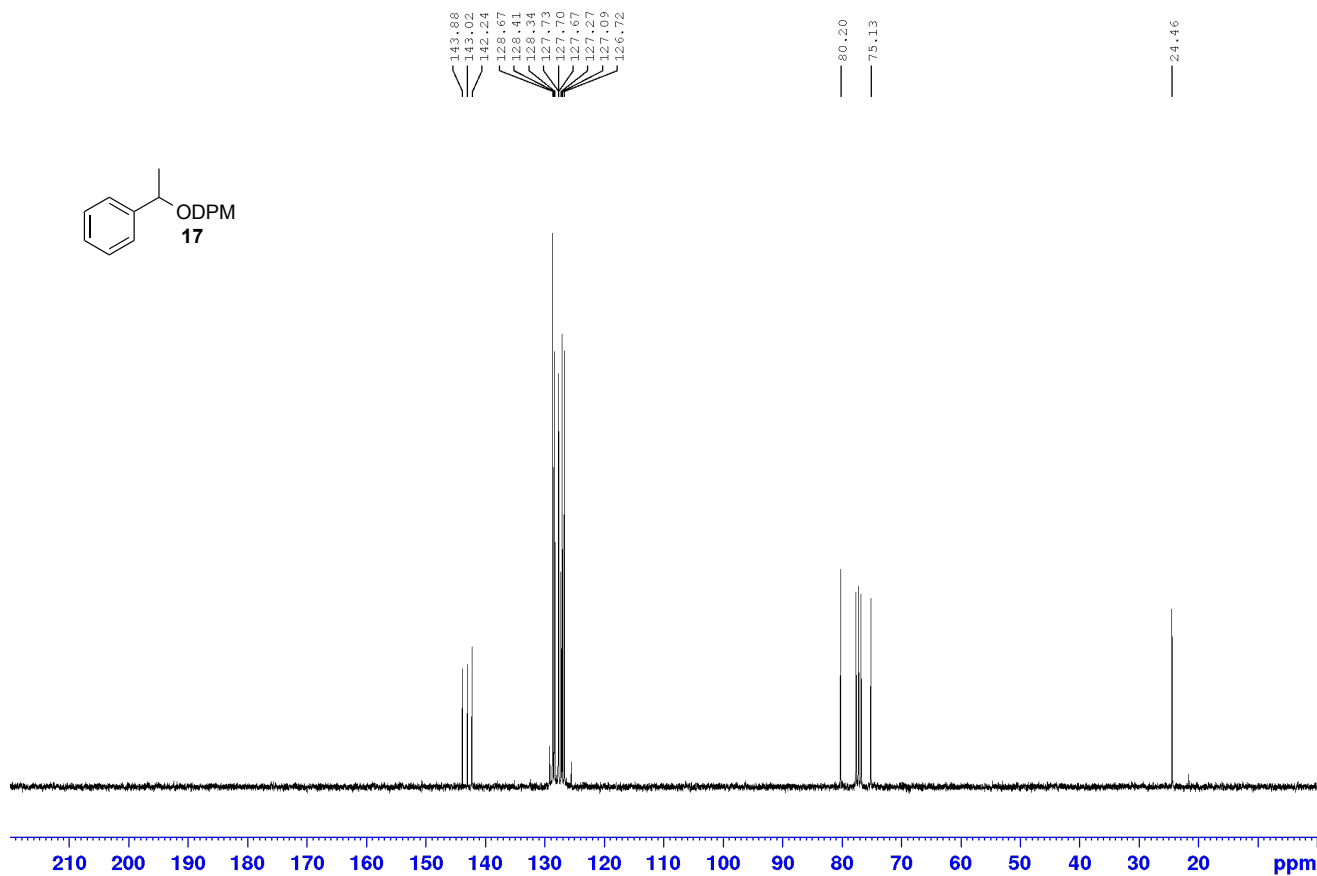

((tert-Pentyloxy)methylene)dibenzene

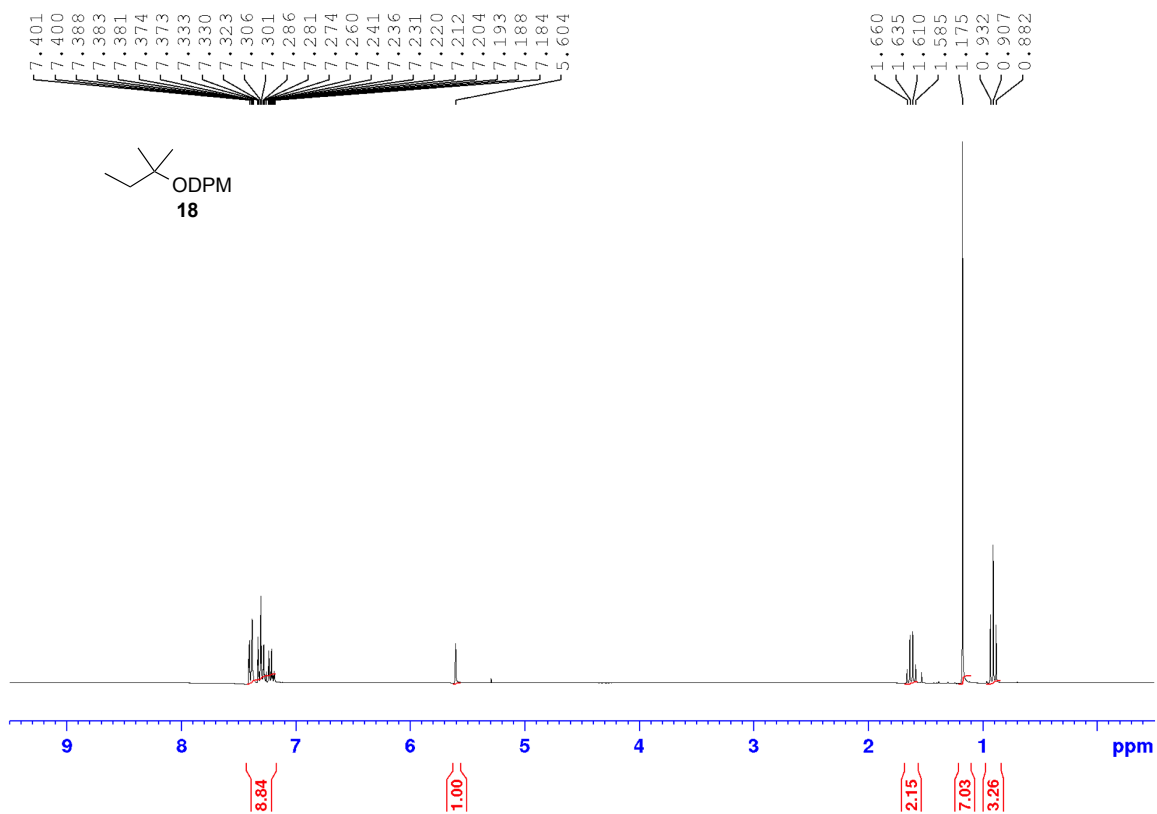

((tert-Pentyloxy)methylene)dibenzene

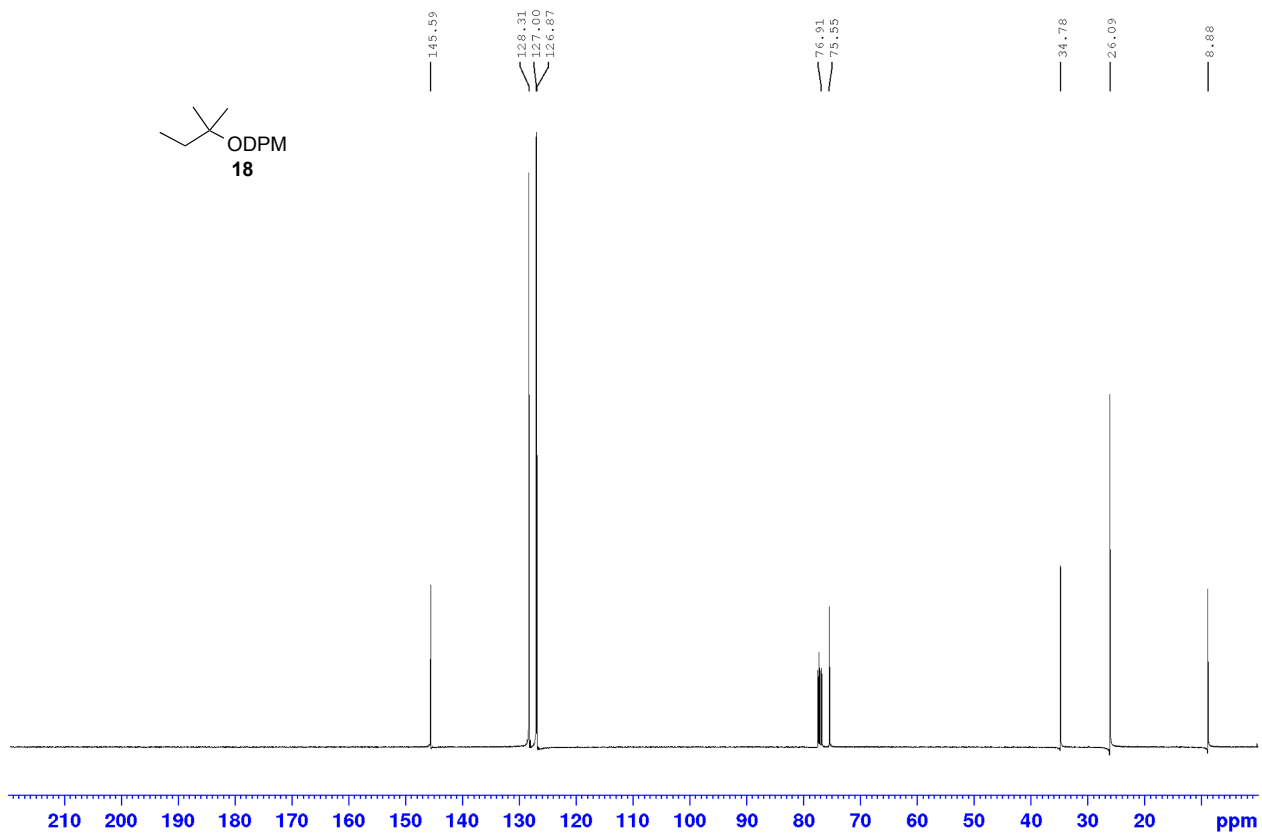



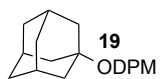

7.393  
7.367  
7.337  
7.313  
7.287  
7.259  
7.250  
7.247  
7.225  
7.204

— 5.795

2.137  
1.837  
1.830  
1.671  
1.625  
1.581  
1.559

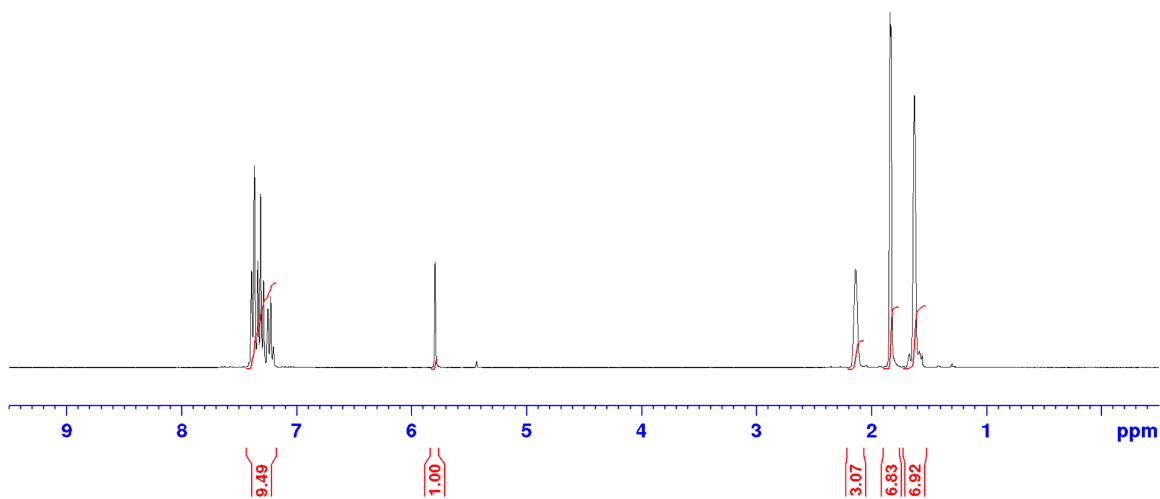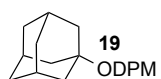

145.30

128.23  
127.21  
126.88

74.41  
73.84

42.95

36.55

30.82

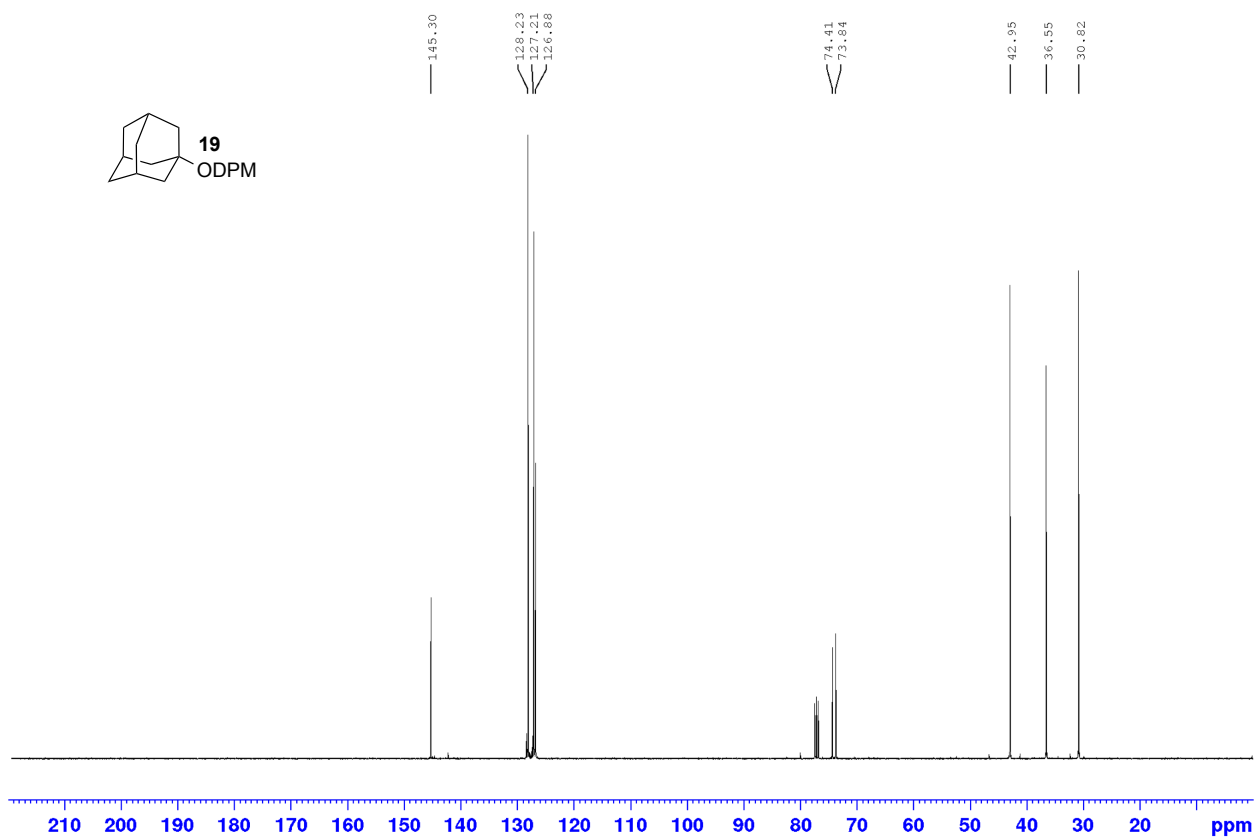

2-((Benzhydryloxy)methyl)-3-phenyloxirane

7.381  
7.377  
7.375  
7.370  
7.364  
7.356  
7.353  
7.347  
7.340  
7.338  
7.330  
7.327  
7.321  
7.317  
7.304  
7.296  
7.289  
7.280  
7.270  
7.265  
7.260  
7.257  
7.252  
7.247  
7.243  
7.232  
5.524  
3.880  
3.870  
3.842  
3.832  
3.798  
3.791  
3.680  
3.663  
3.642  
3.624  
3.319  
3.312  
3.308  
3.301  
3.294  
3.291  
3.284

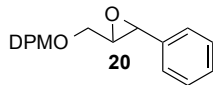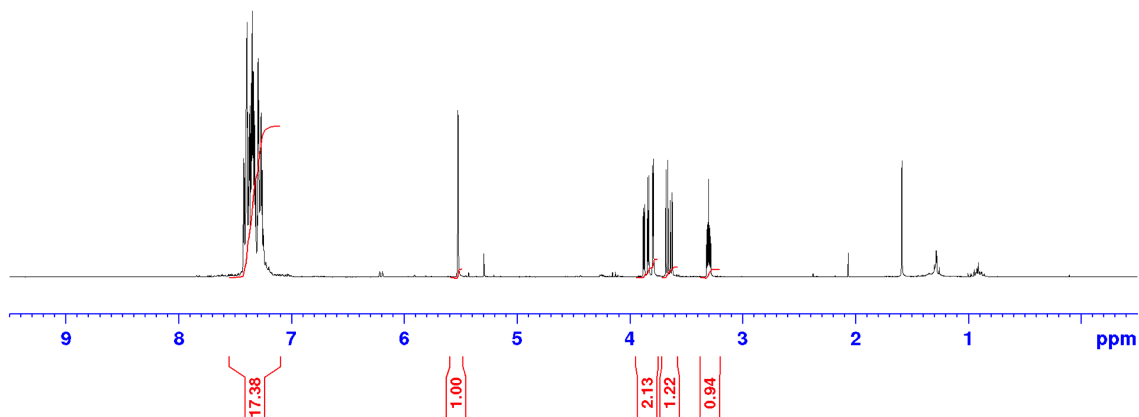

2-((Benzhydryloxy)methyl)-3-phenyloxirane

141.99  
141.94  
137.13  
128.66  
128.63  
128.41  
127.80  
127.47  
127.26  
127.15  
125.89  
84.14  
68.85  
61.44  
56.14

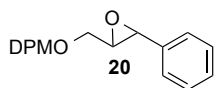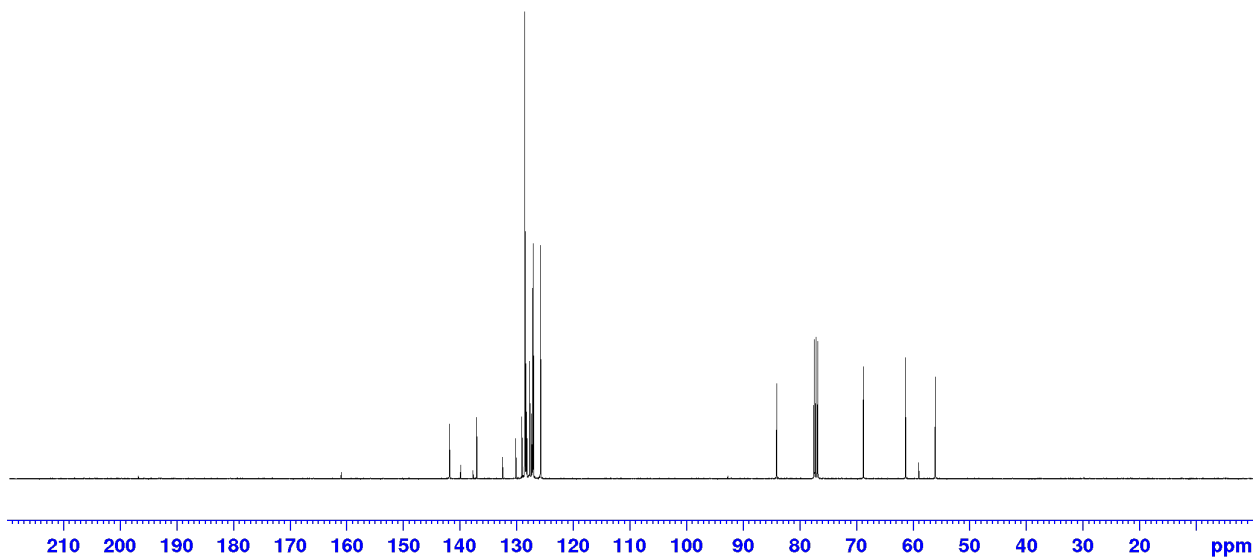

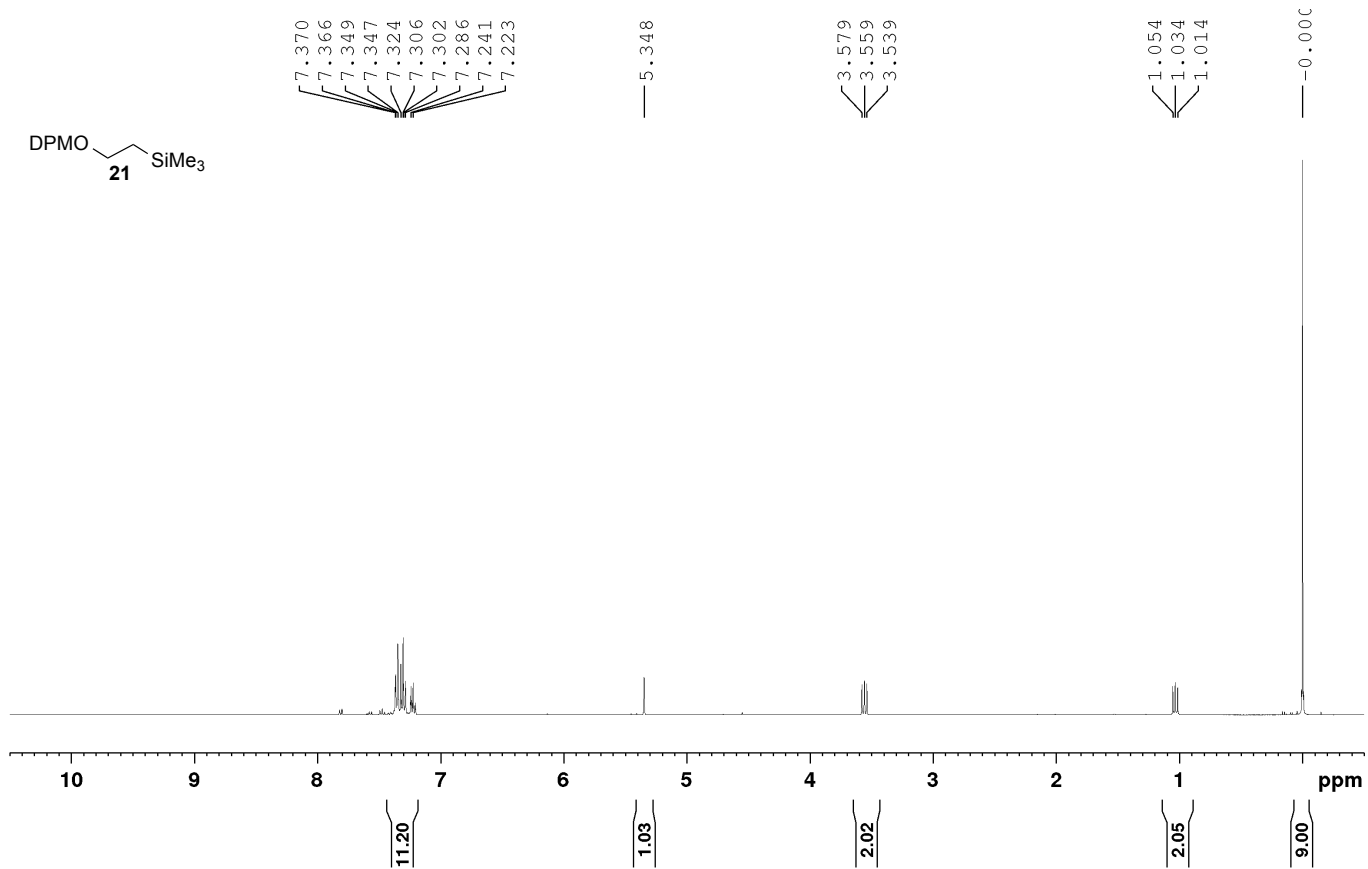

BCD-II-66 C13

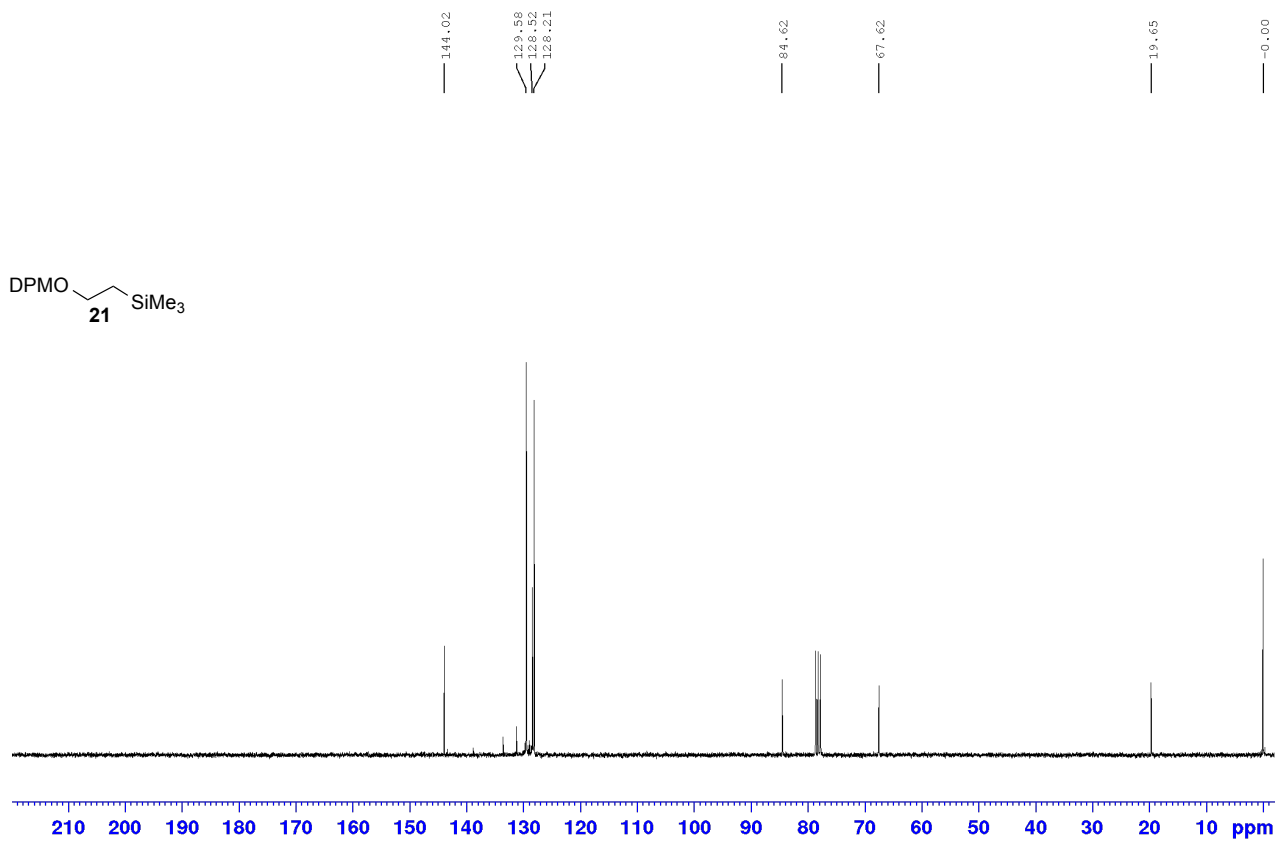

2-(Benzhydryloxy) isoindoline-1,3-dione

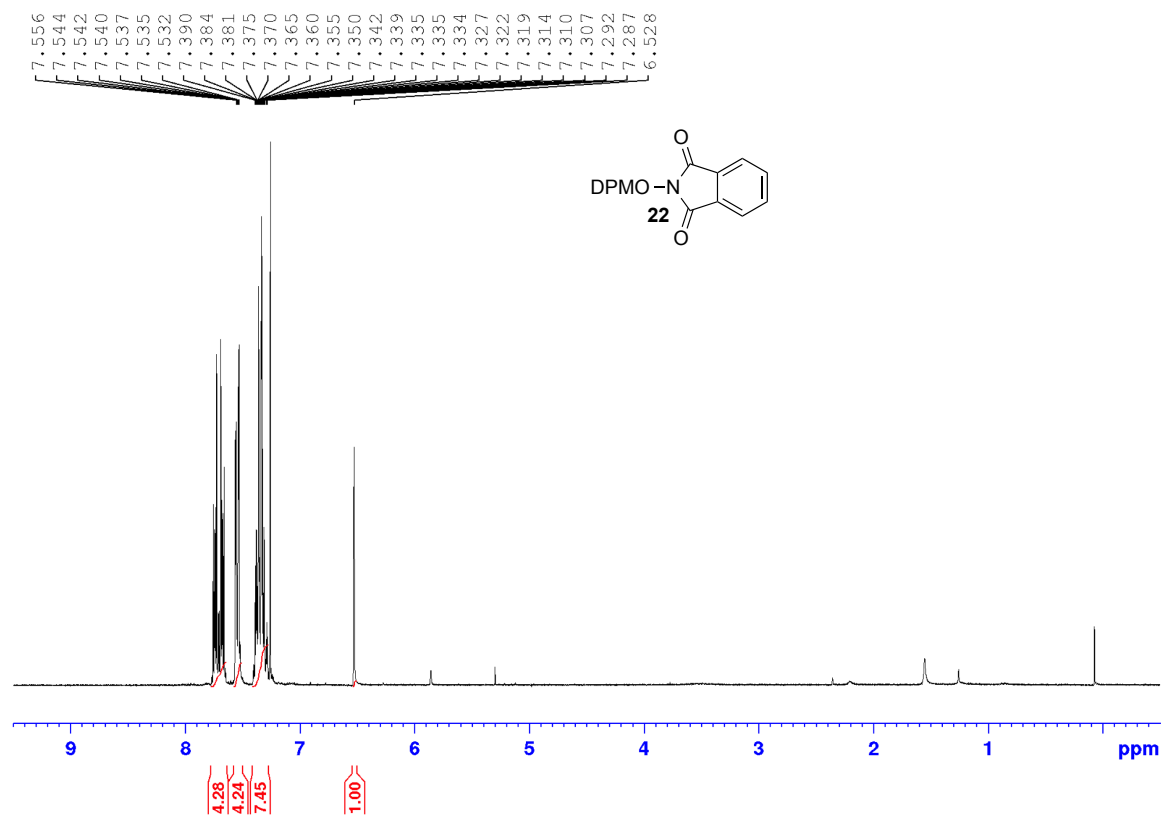

2-(Benzhydryloxy) isoindoline-1,3-dione

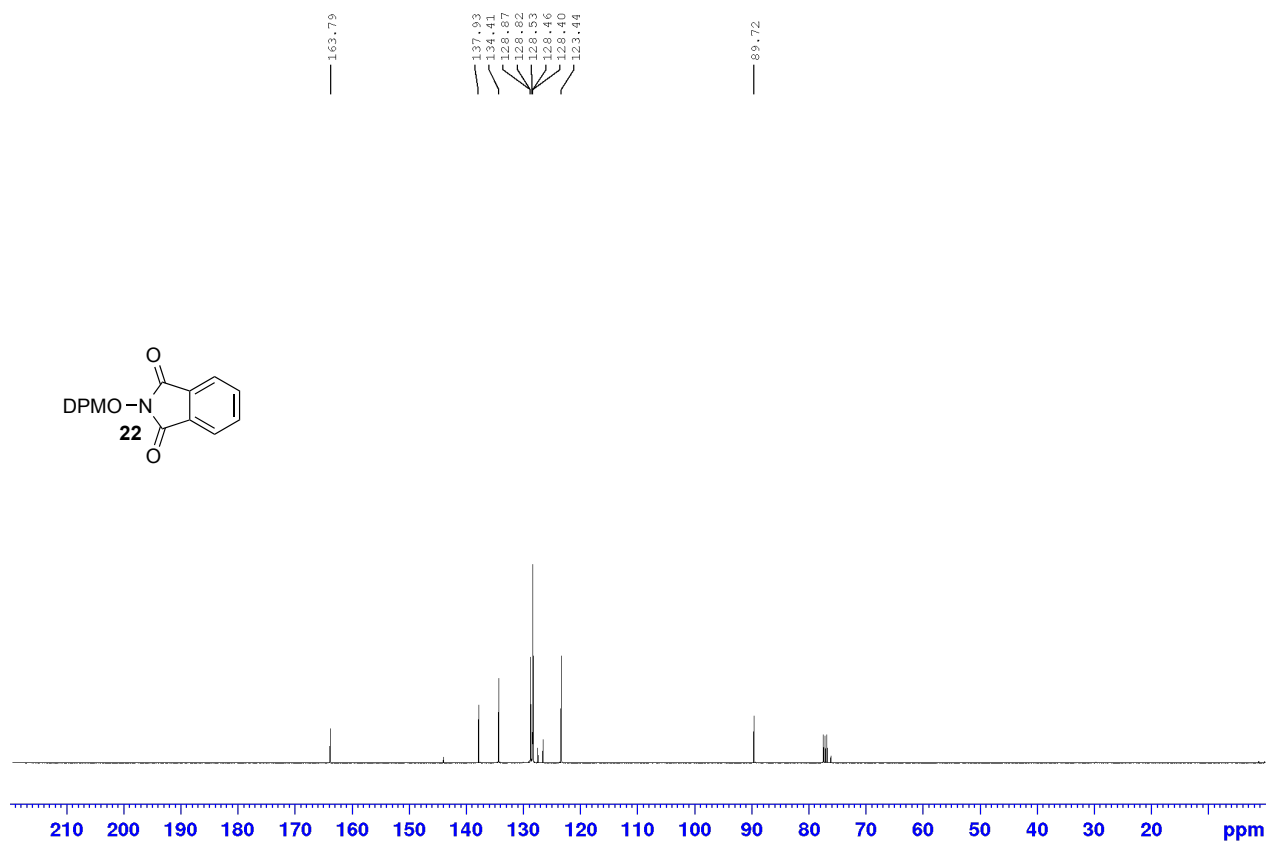

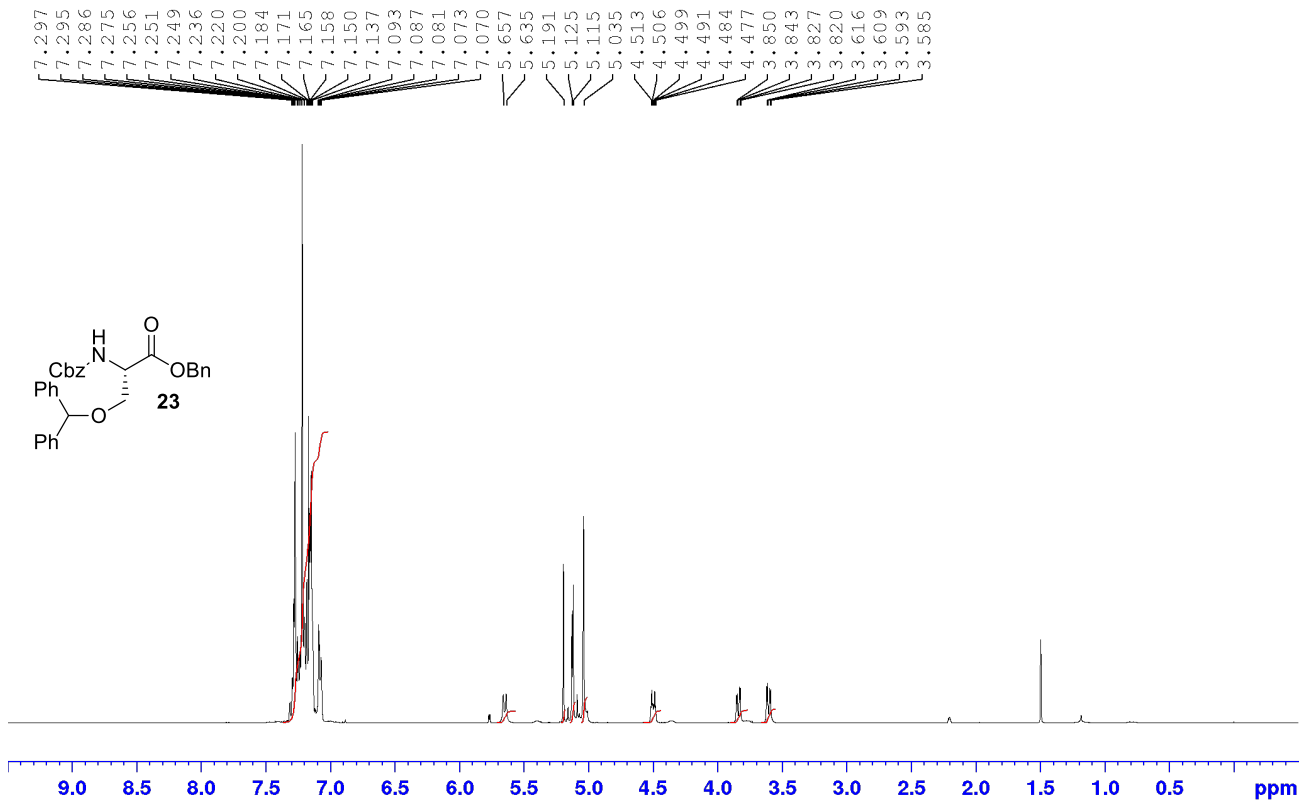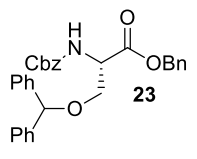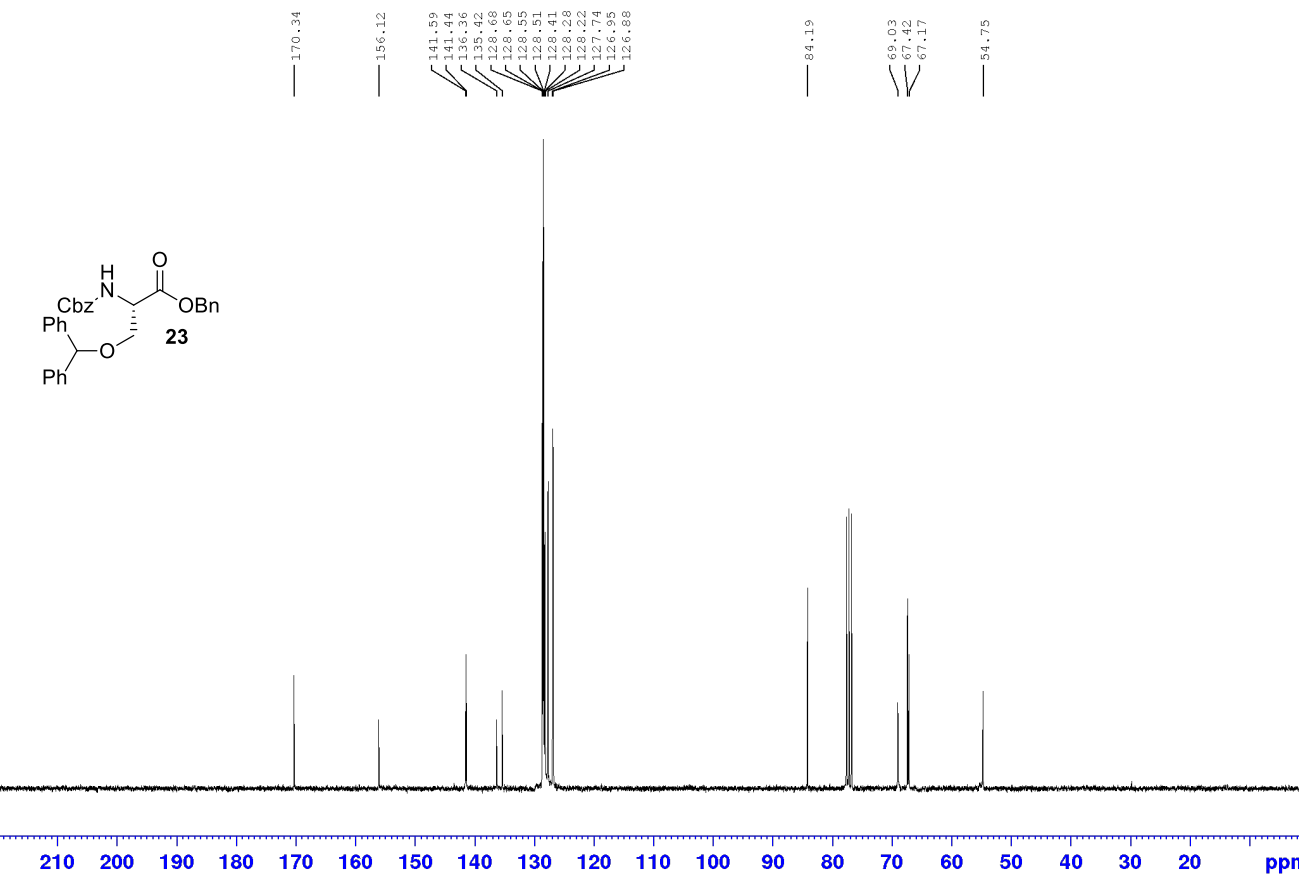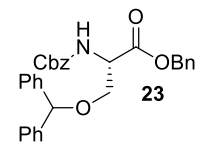

BCD-II-62

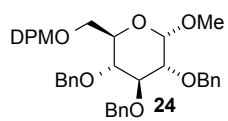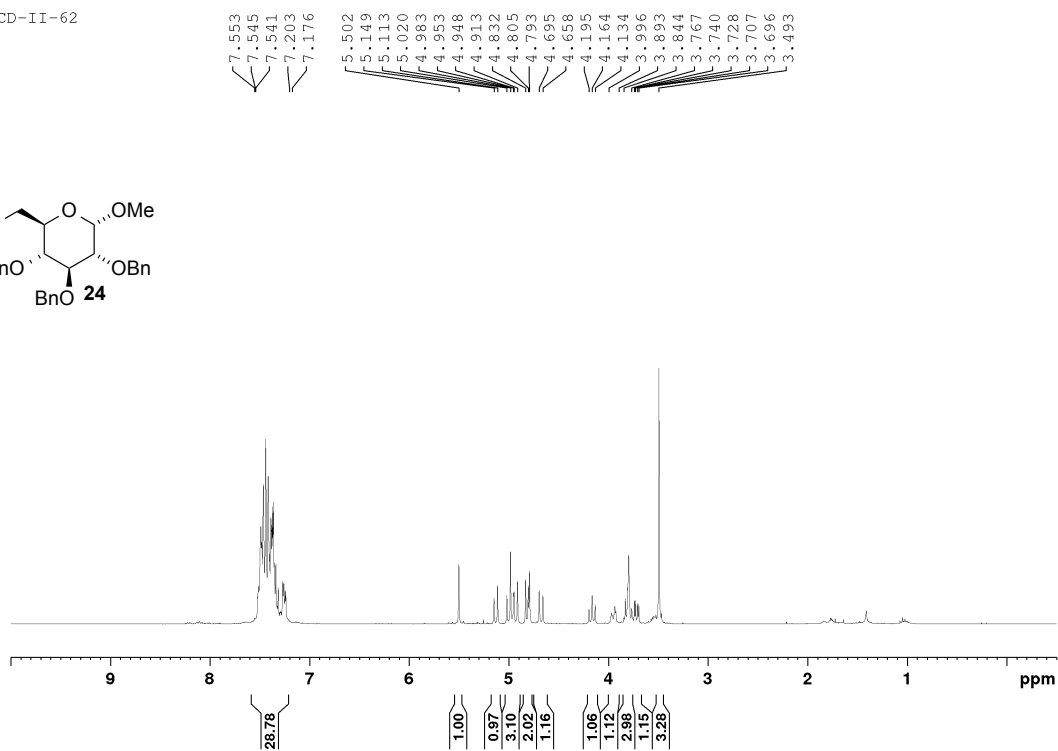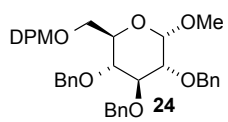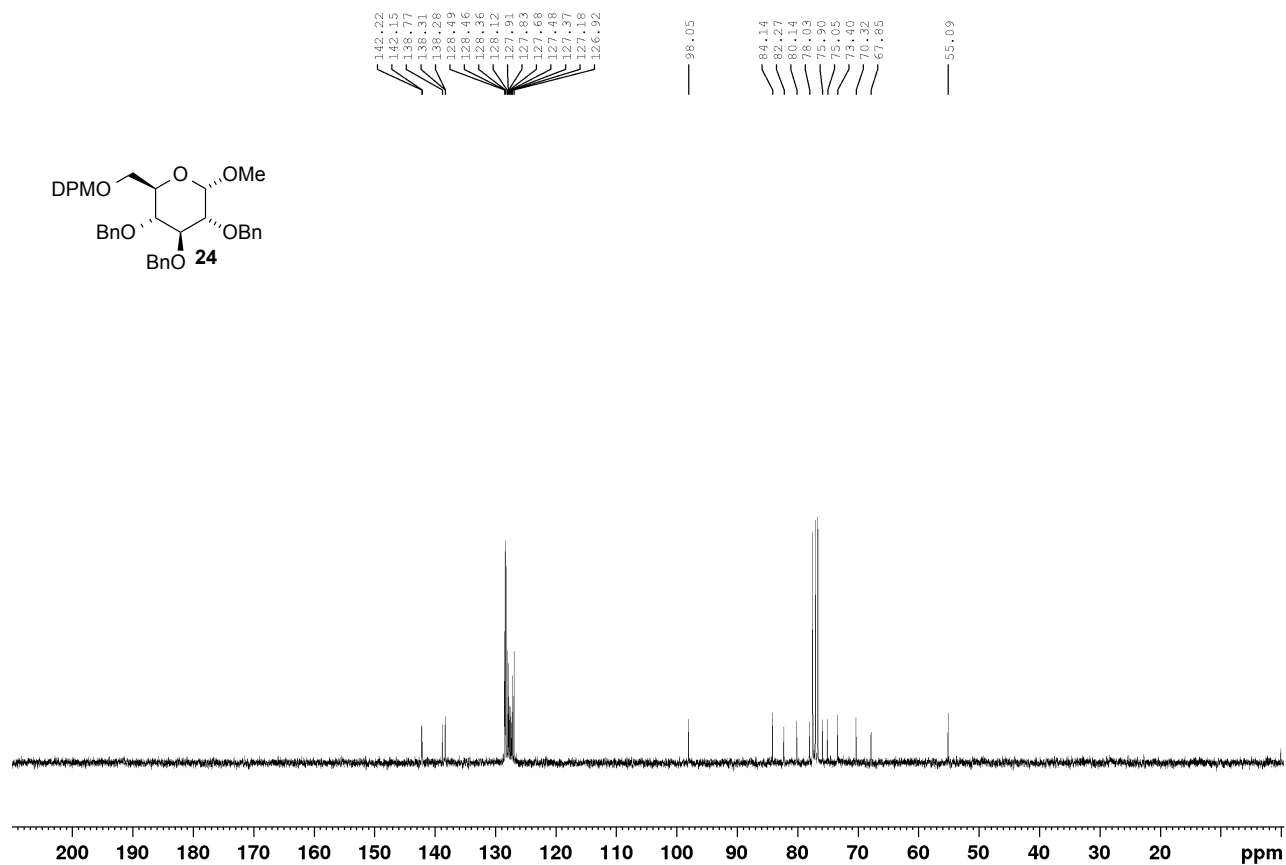

(3S, 5S, 8R, 9S, 10S, 13R, 14S, 17R)-3-(Benzhydryloxy)-10,13-dimethyl-17-  
 ((R)-6-methylheptan-2-yl)hexadecahydro-1H-cyclopenta[a]phenanthrene

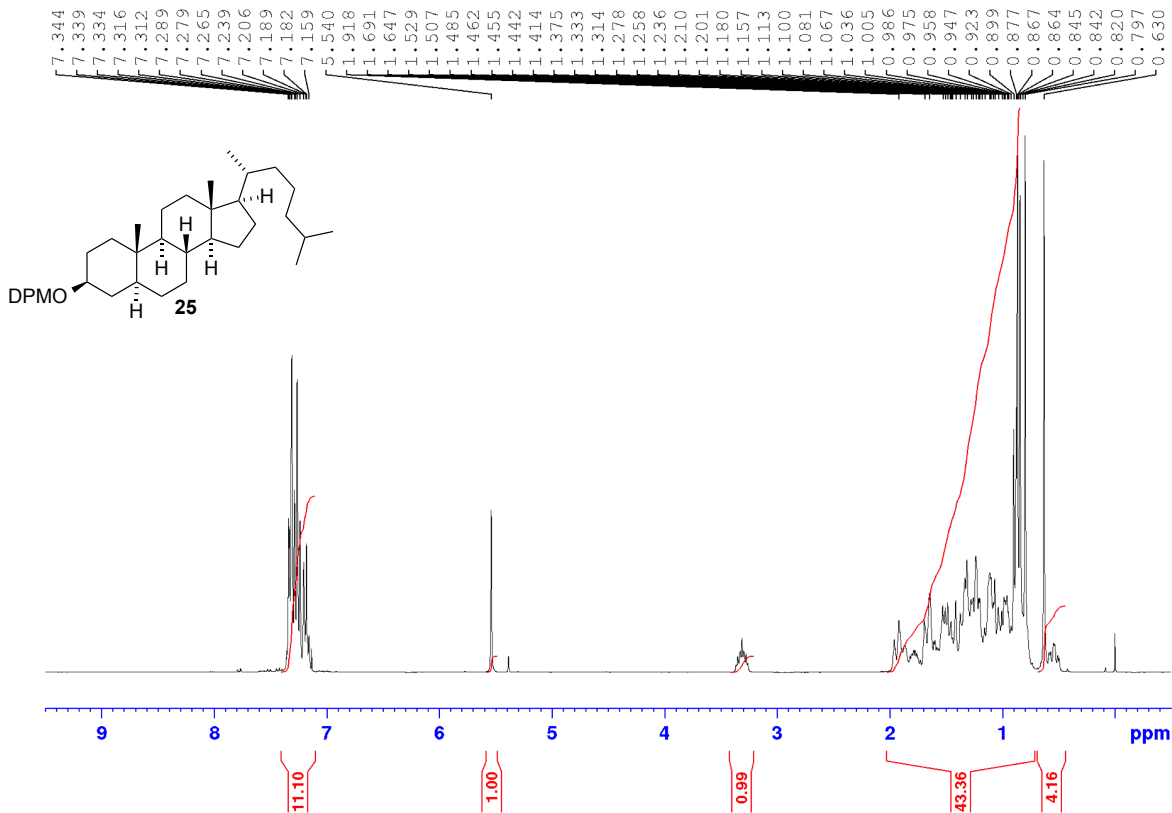

(3S, 5S, 8R, 9S, 10S, 13R, 14S, 17R)-3-(Benzhydryloxy)-10,13-dimethyl-17-  
 ((R)-6-methylheptan-2-yl)hexadecahydro-1H-cyclopenta[a]phenanthrene

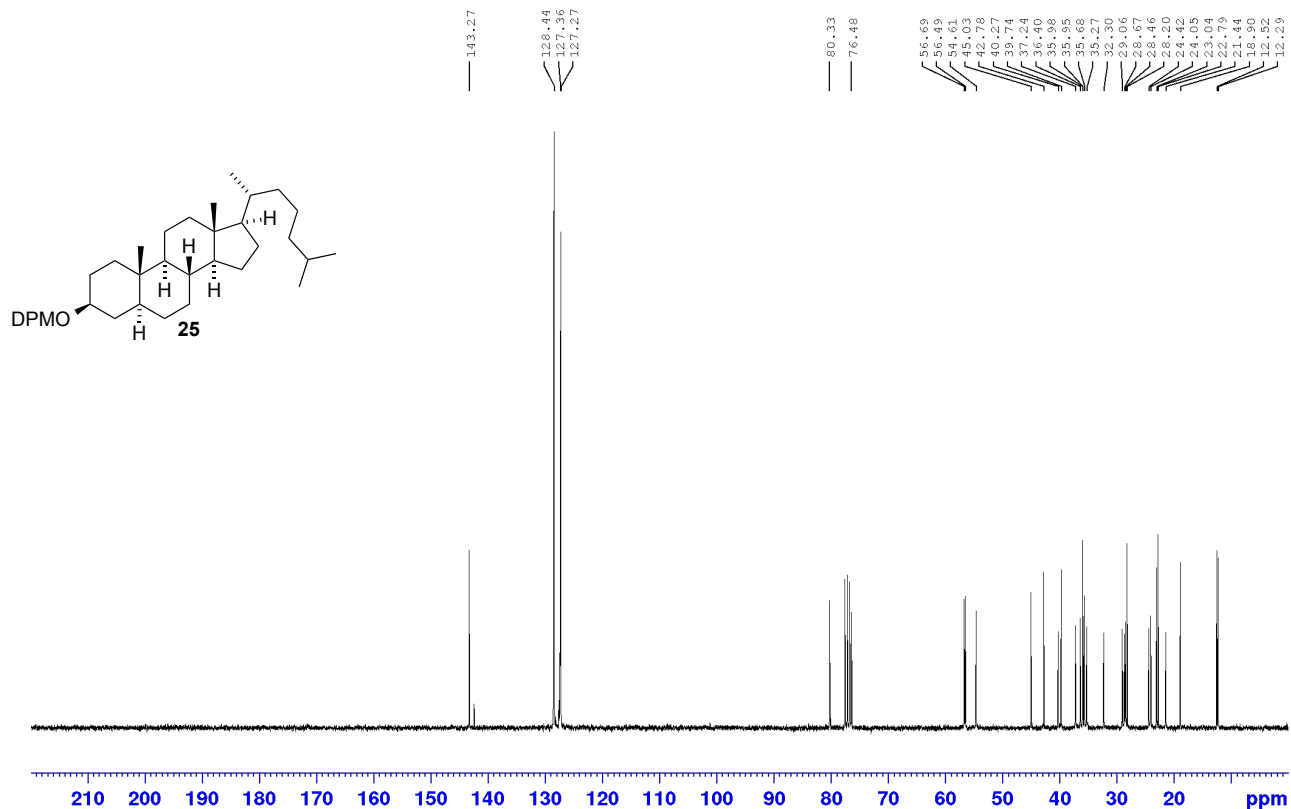

Ethyl 3-(benzhydryloxy)-3-phenylpropanoate

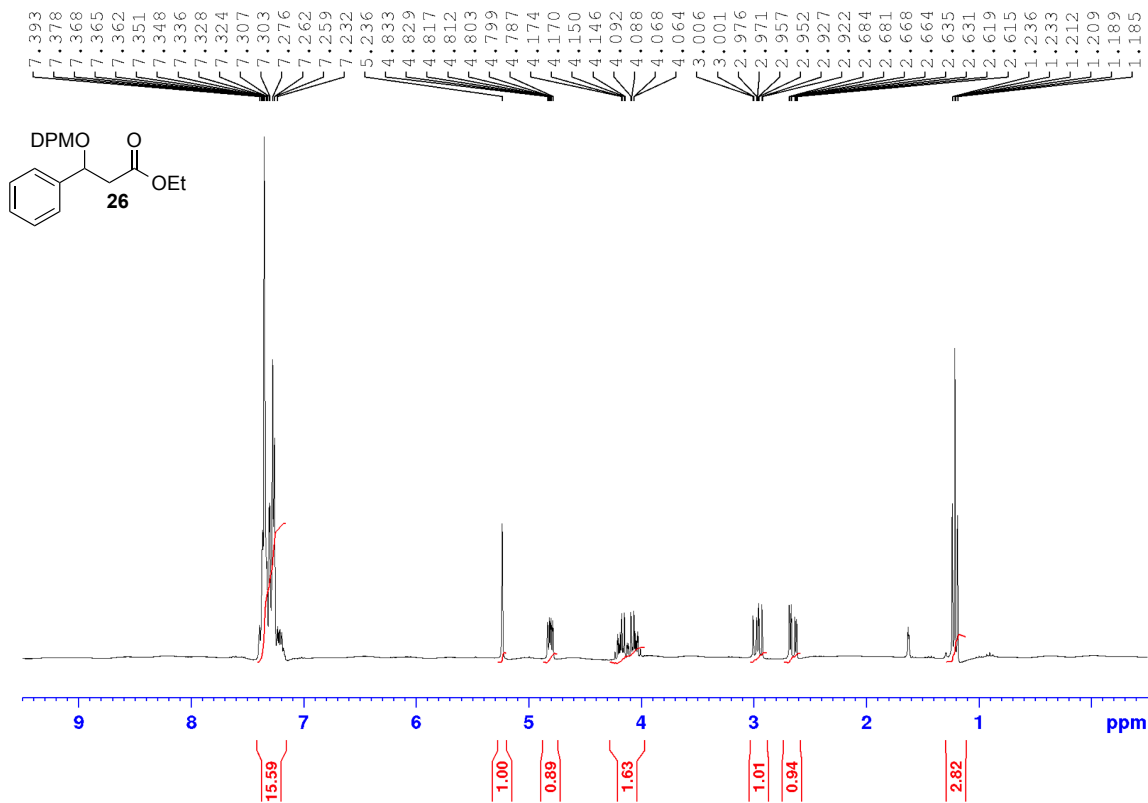

Ethyl 3-(benzhydryloxy)-3-phenylpropanoate

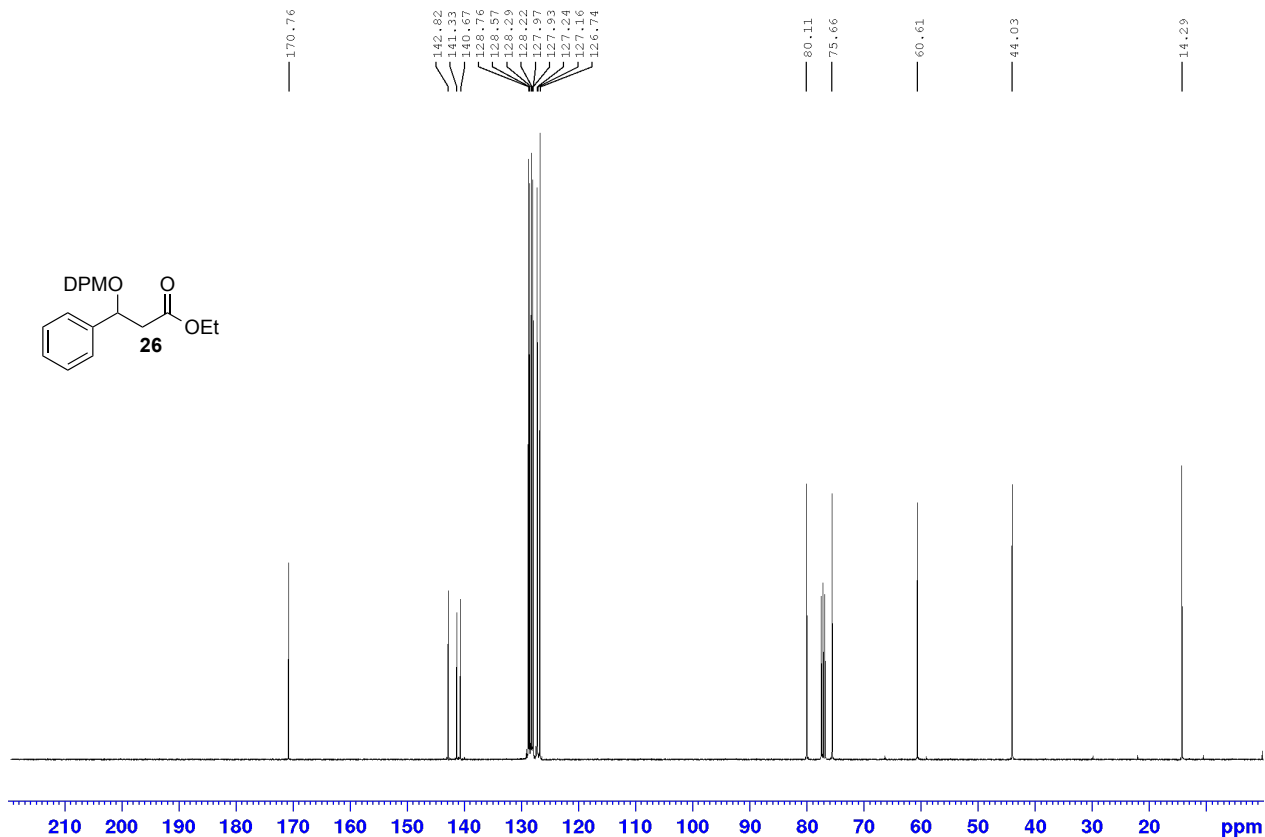



(R)-Ethyl 2-(benzhydryloxy)propanoate

7.406  
7.391  
7.389  
7.367  
7.354  
7.350  
7.342  
7.327  
7.320  
7.314  
7.312  
7.300  
7.289  
7.288  
7.286  
7.284  
7.279  
7.255  
5.569  
4.277  
4.264  
4.263  
4.250  
4.248  
4.241  
4.239  
4.226  
4.224  
4.217  
4.215  
4.202  
4.201  
4.193  
4.191  
4.179  
4.177  
4.167  
4.165  
4.112  
4.089  
4.087  
4.066  
4.064  
4.043  
1.498  
1.496  
1.475  
1.473  
1.329  
1.327  
1.305  
1.303  
1.281  
1.279

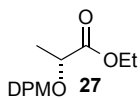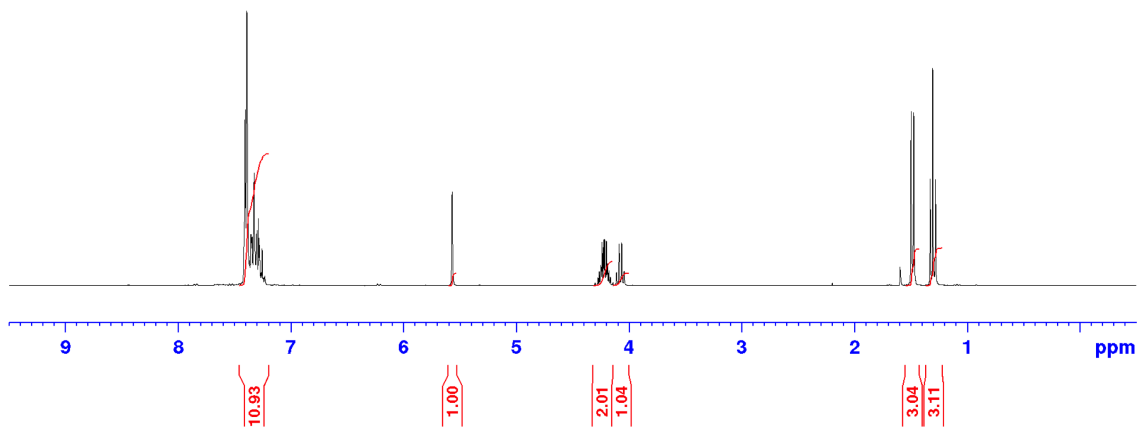

(R)-Ethyl 2-(benzhydryloxy)propanoate

173.55  
142.06  
141.13  
128.74  
128.40  
128.03  
127.66  
127.52  
82.83  
72.66  
60.99  
19.00  
14.40

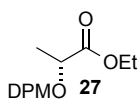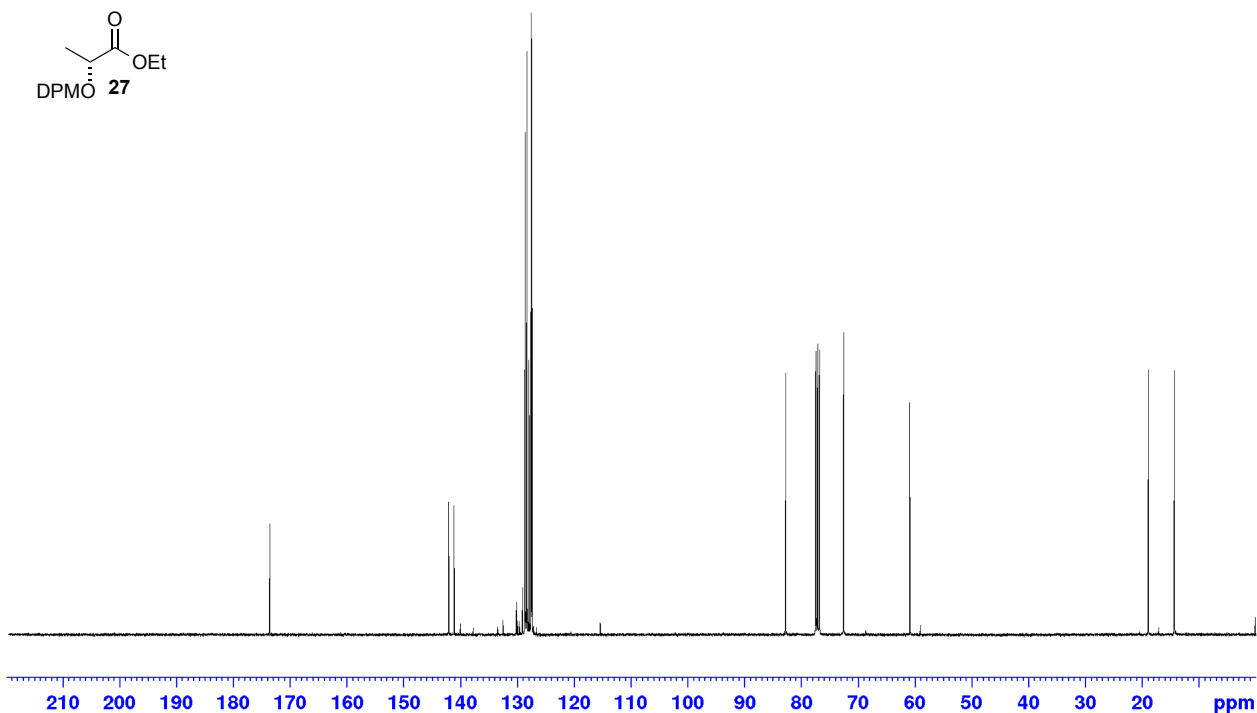

(3S)-Benzyl 3-(benzhydryloxy)-2-((benzyloxy) carbonyl) amino) butanoate

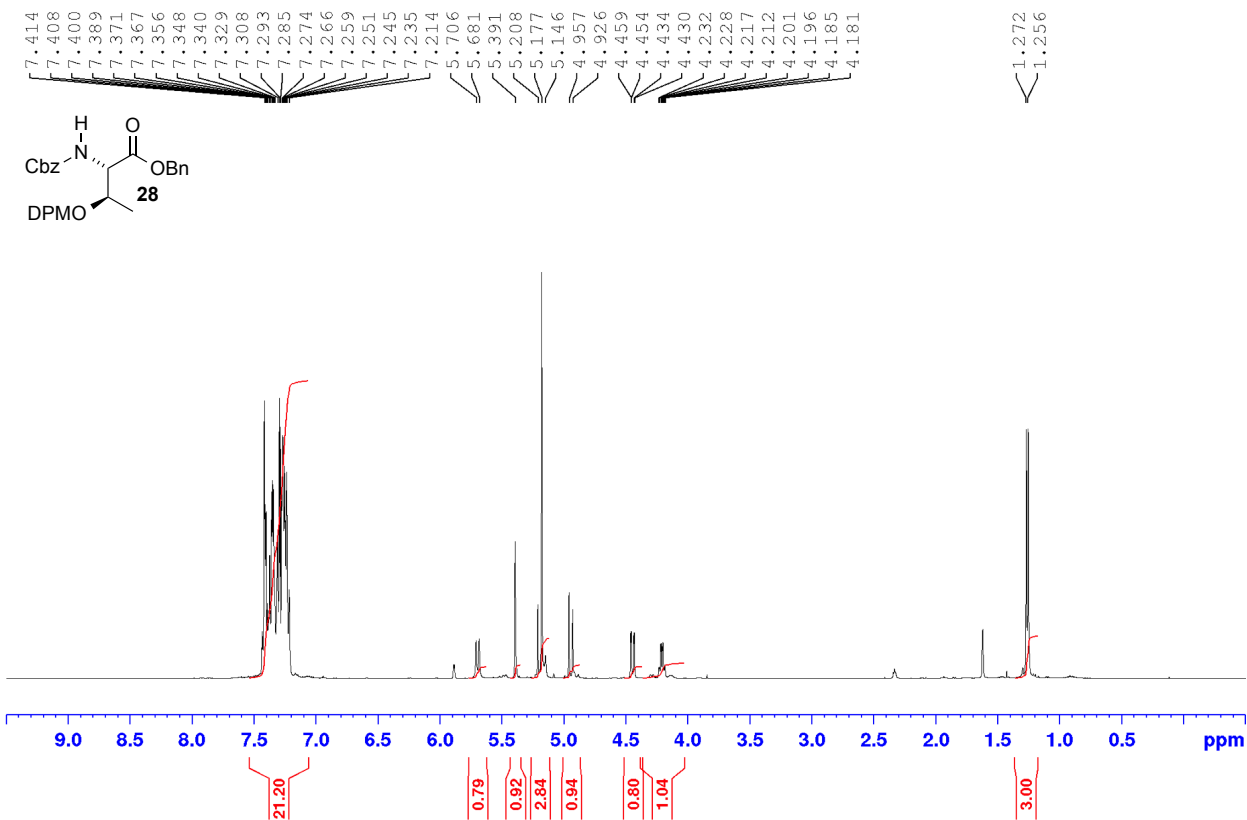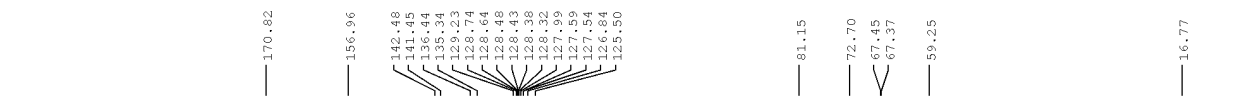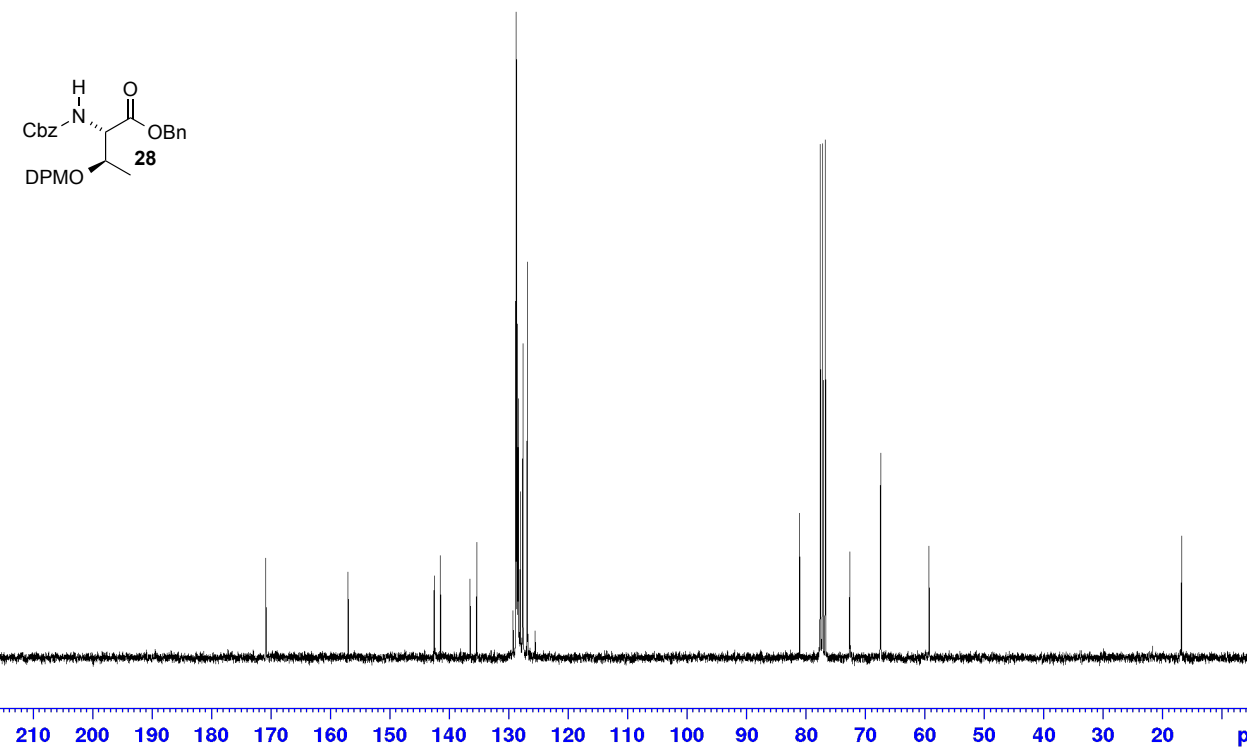

((4-Methoxyphenoxy)methylene)dibenzene

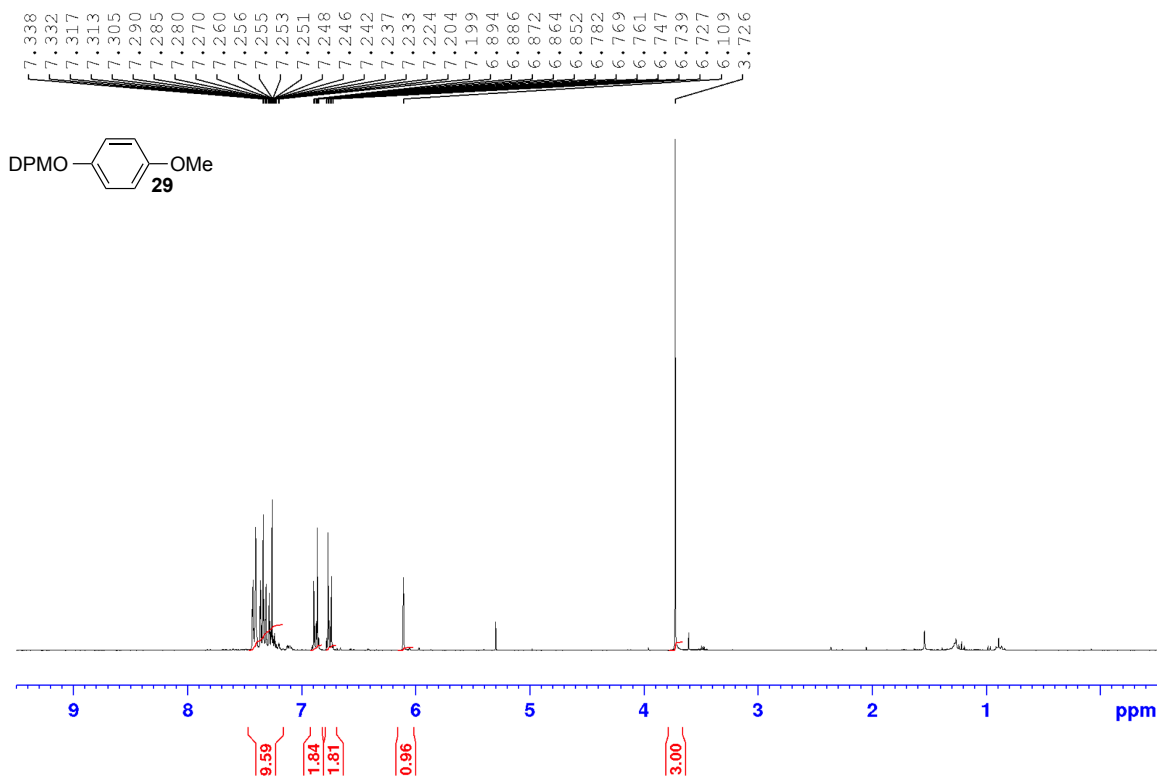

((4-Methoxyphenoxy)methylene)dibenzene

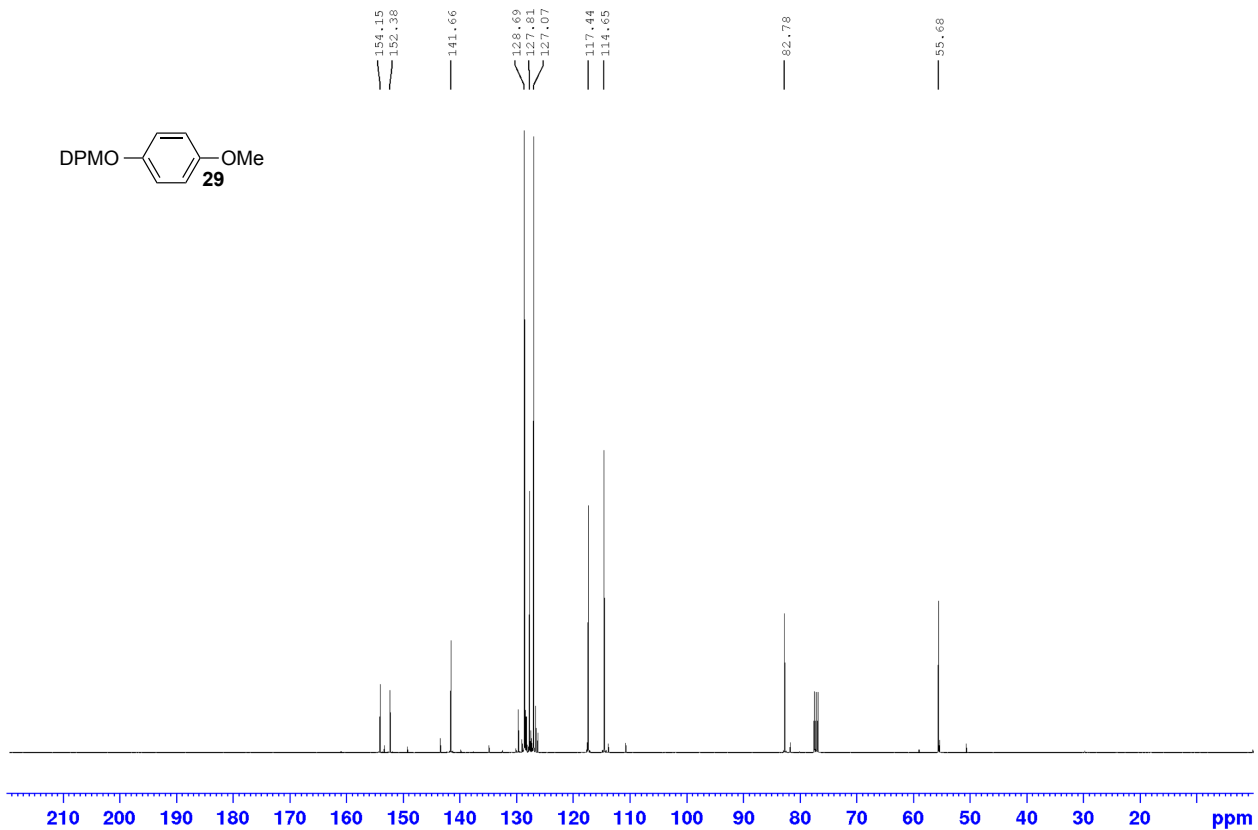

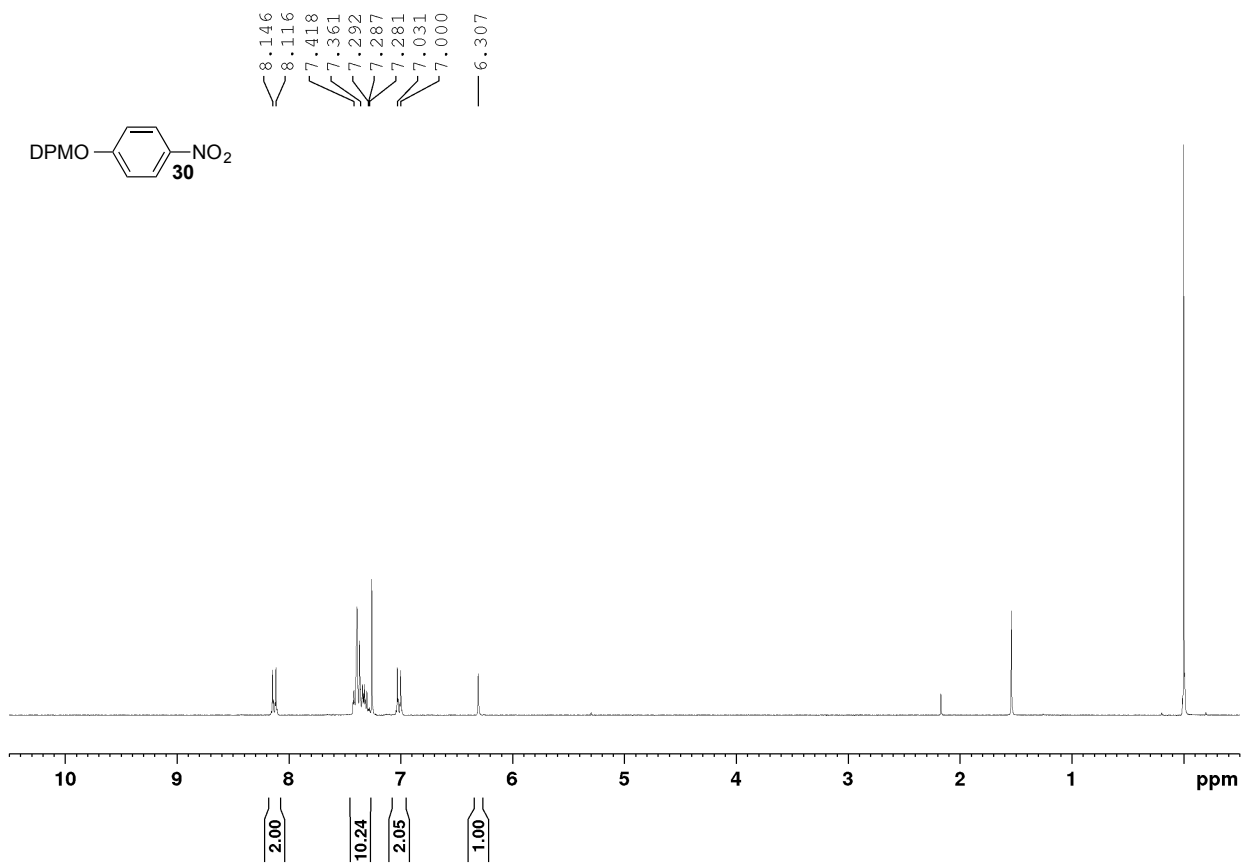

BCD-II-63 C13

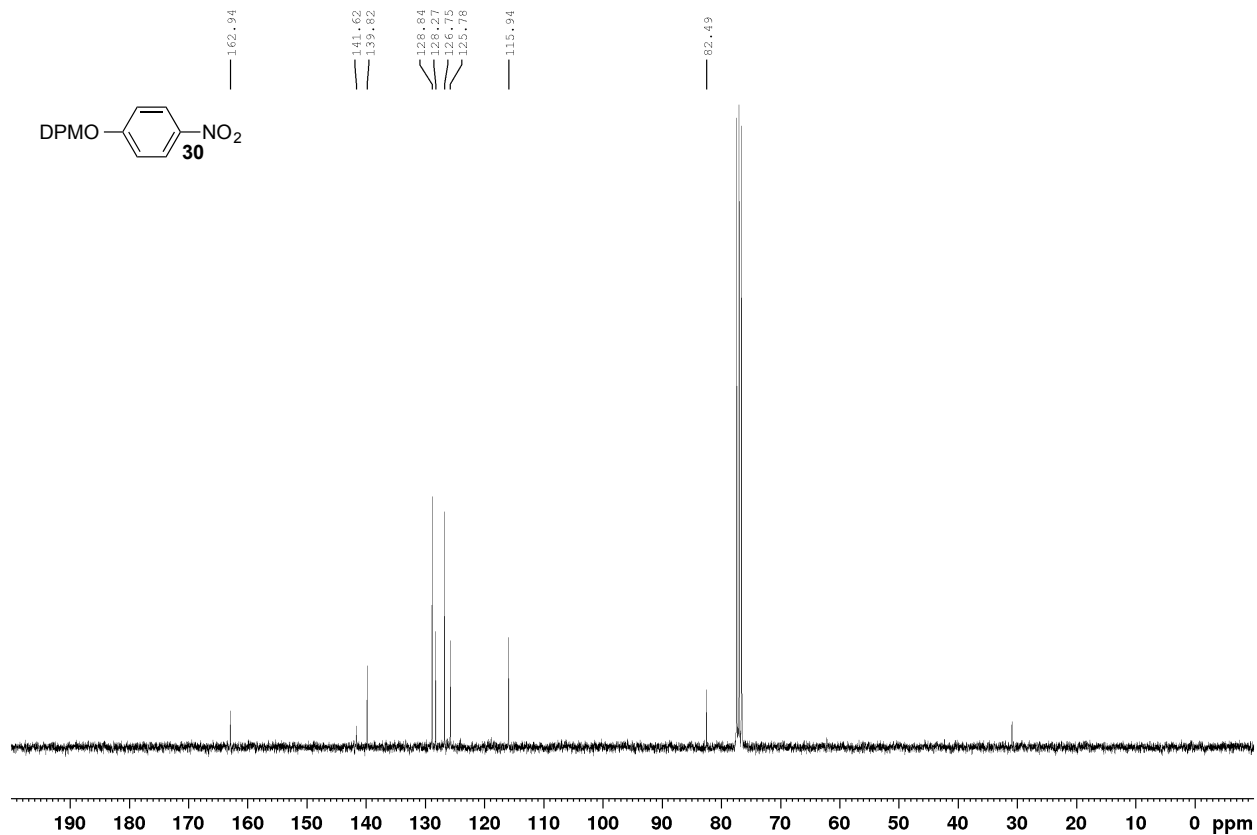

Methyl 3-(benzhydryloxy)thiophene-2-carboxylate

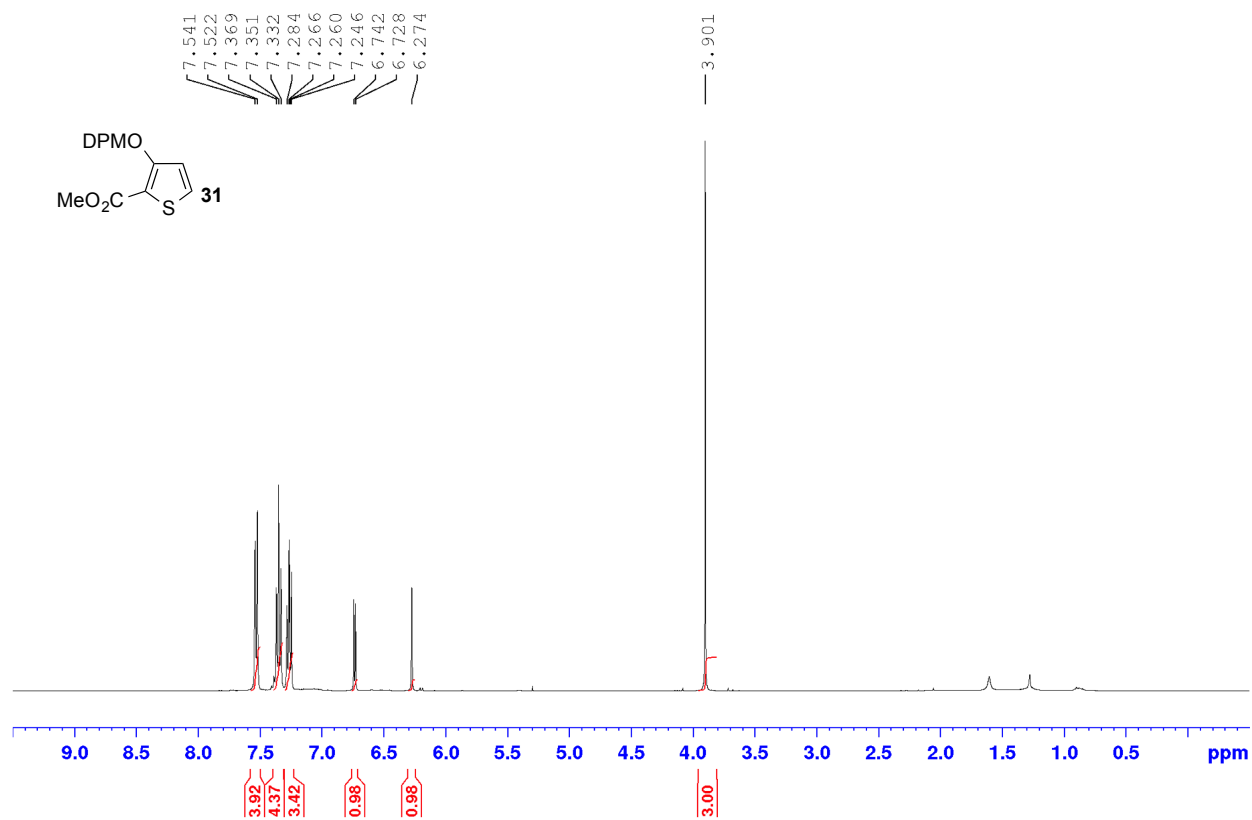

Methyl 3-(benzhydryloxy)thiophene-2-carboxylate

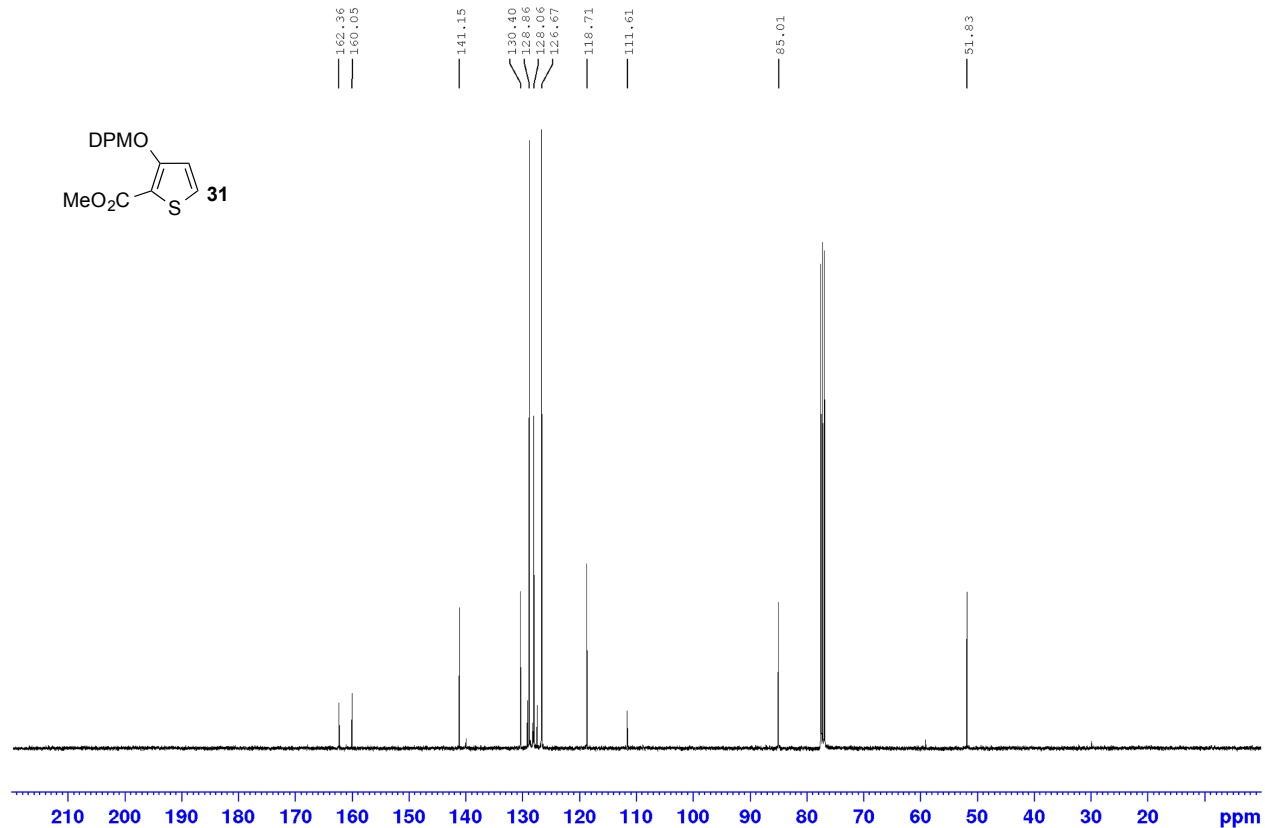

2-(Benzhydryloxy)naphthalene

7.880  
7.860  
7.833  
7.811  
7.514  
7.510  
7.493  
7.489  
7.475  
7.472  
7.411  
7.407  
7.405  
7.402  
7.394  
7.368  
7.355  
7.349  
7.184  
7.179  
7.175  
7.162  
7.157  
7.153  
6.530  
5.345

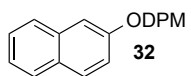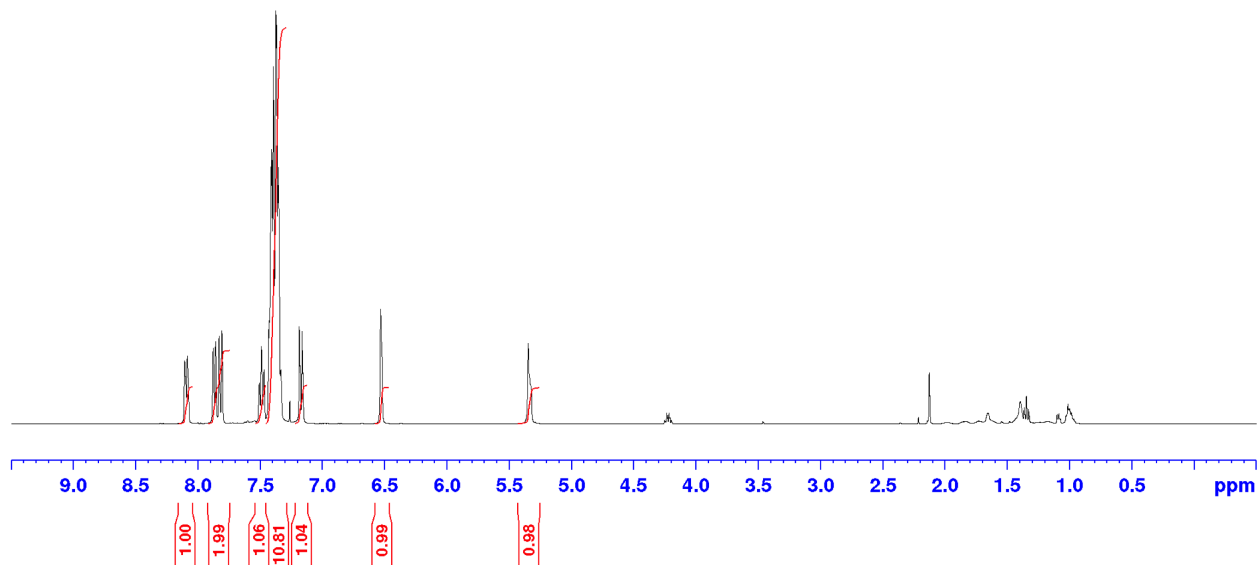

2-(Benzhydryloxy)naphthalene

152.95  
141.82  
133.61  
128.86  
128.79  
128.73  
129.19  
128.91  
127.35  
127.00  
123.39  
123.03  
120.39  
119.98  
48.73

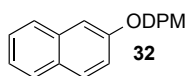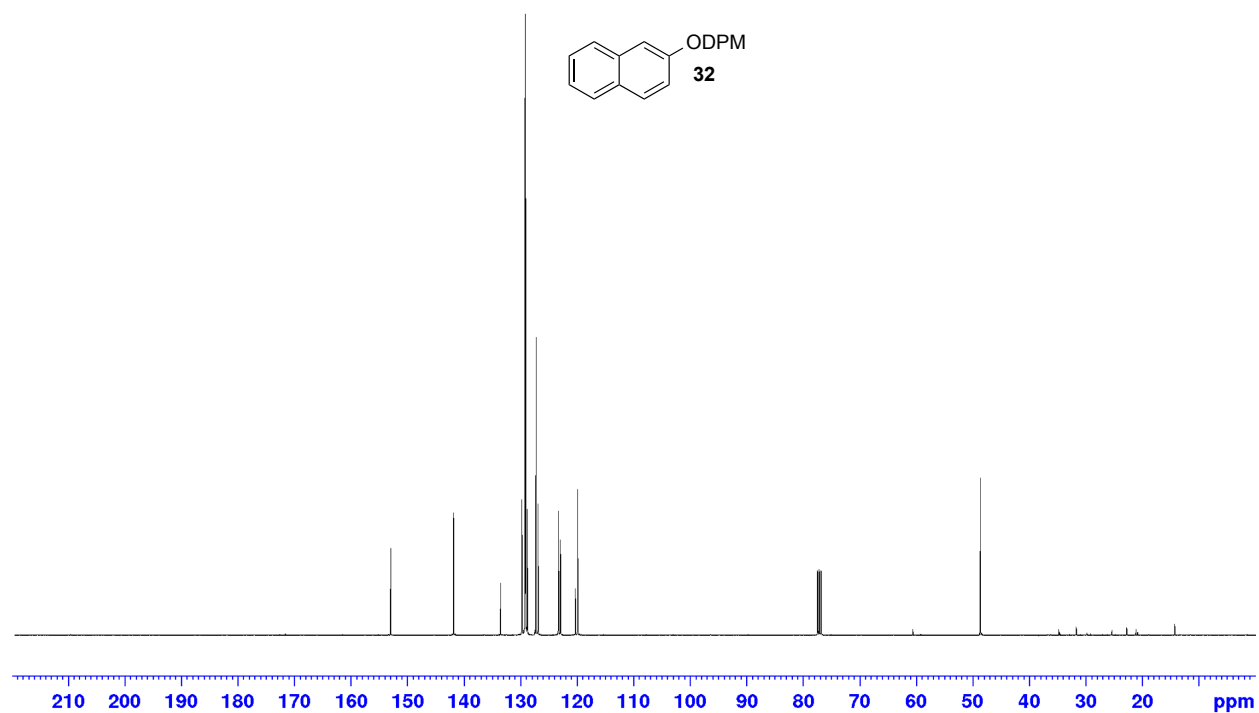

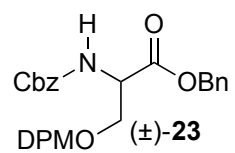

10% 2-Propanol/Hexane  
Chiracel OD

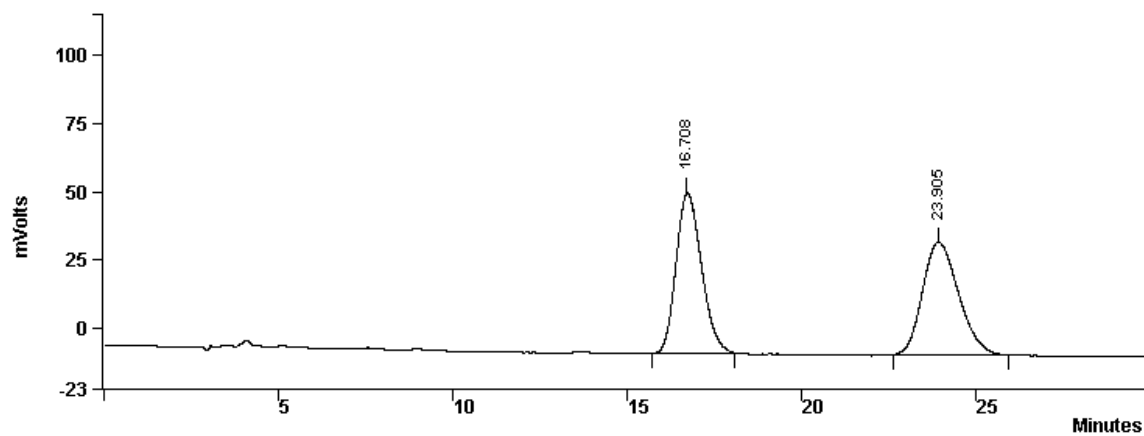

| Peak No        | Ret. Time (min) | Area (counts) | Sep. Code | Width 1/2 (sec) | Result (Area%)  |
|----------------|-----------------|---------------|-----------|-----------------|-----------------|
| 1              | 16.708          | 2992683       | BB        | 49.0            | 50.1029         |
| 2              | 23.905          | 2980387       | BB        | 68.2            | 49.8971         |
| <b>5973070</b> |                 |               |           |                 | <b>100.0000</b> |

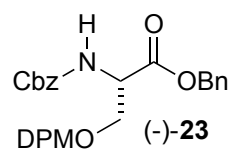

10% 2-Propanol/Hexane  
Chiracel OD

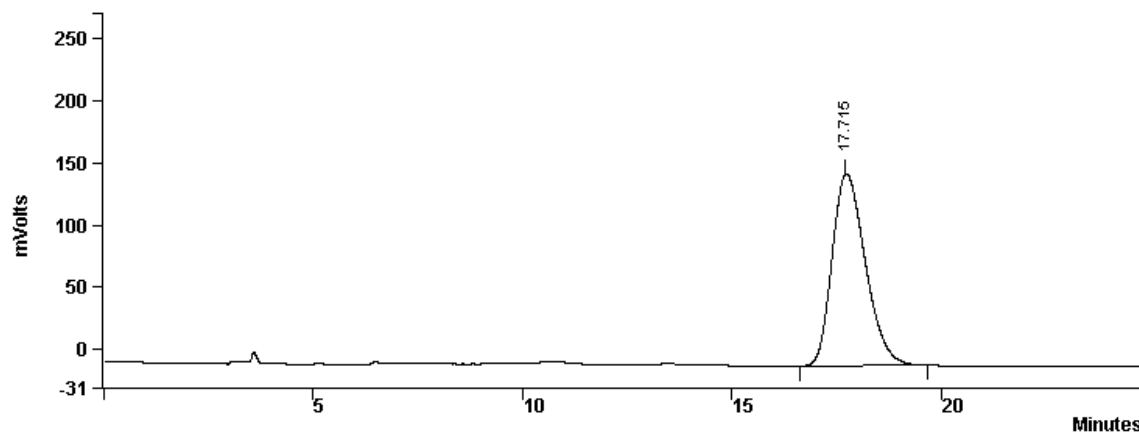

| Peak No | Ret. Time (min) | Area (counts)  | Sep. Code | Width 1/2 (sec) | Result (Area%)  |
|---------|-----------------|----------------|-----------|-----------------|-----------------|
| 1       | 17.715          | 8584036        | BB        | 54.0            | 100.0000        |
|         |                 | <b>8584036</b> |           |                 | <b>100.0000</b> |



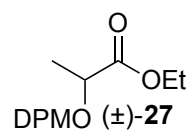

1% 2-Propanol/Hexane  
Chiracel OD

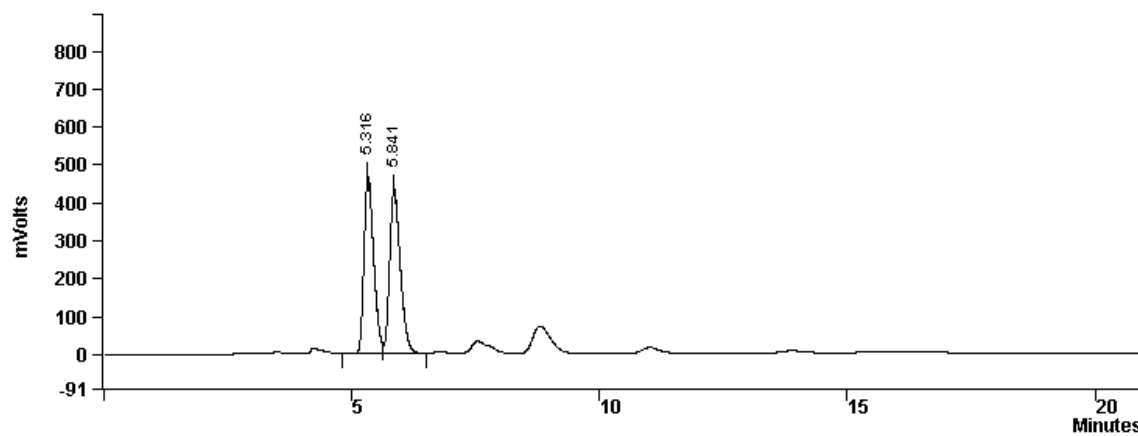

| Peak No | Ret. Time (min) | Area (counts)   | Sep. Code | Width 1/2 (sec) | Result (Area%)  |
|---------|-----------------|-----------------|-----------|-----------------|-----------------|
| 1       | 5.316           | 6329418         | BV        | 12.6            | 49.3661         |
| 2       | 5.841           | 6491965         | VB        | 13.7            | 50.6339         |
|         |                 | <b>12821383</b> |           |                 | <b>100.0000</b> |

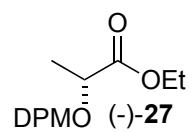

1% 2-Propanol/Hexane  
Chiracel OD

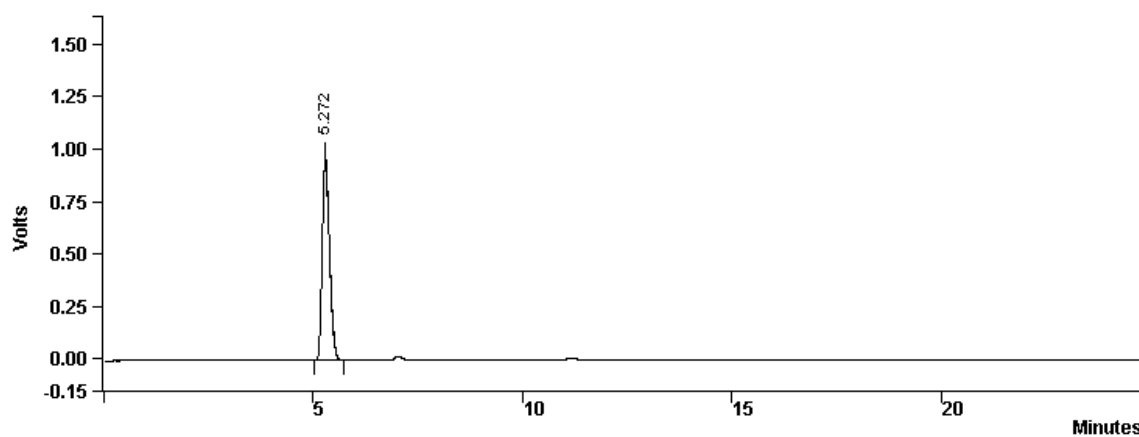

| Peak No | Ret. Time (min) | Area (counts)   | Sep. Code | Width 1/2 (sec) | Result (Area%)  |
|---------|-----------------|-----------------|-----------|-----------------|-----------------|
| 1       | 5.272           | 11704315        | BB        | 11.3            | 100.0000        |
|         |                 | <b>11704315</b> |           |                 | <b>100.0000</b> |

## References:

- (1) Pangborn, A. B.; Giardello, M. A.; Grubbs, R. H.; Rosen, R. K.; Timmers, F. J. *Organometallics* **1996**, *15*, 1518.
- (2) Xu, Q.; Xie, H.; Chen, P.; Yu, L.; Chen, J.; Hu, X. *Green Chem.* **2015**, *17*, 2774.
- (3) Kalutharage, N.; Yi, C. S. *Org. Lett.* **2015**, *17*, 1778.
- (4) Zhang, W.; Haight, A. R.; Hsu, M. C. *Tetrahedron Lett.* **2002**, *43*, 6575.
- (5) Louvel, J.; Carvalho, J. F. S.; Yu, Z.; Soethoudt, M.; Linselink, E. B.; Klaasse, E.; Brussee, J.; Ijzerman, A. P. *J. Med. Chem.* **2013**, *56*, 9427.
- (6) Bhaskar, G.; Solomon, M.; Babu, G.; Muralidharan, D.; Perumal, P. T. *Indian J. Chem., Sect. B* **2010**, *49B*, 795.
- (7) Sciebura, J.; Gawronski, J. *Tetrahedron: Asymmetry* **2013**, *24*, 683.
- (8) Buckley, A.; Chapman, N. B.; Dack, M. R. J.; Shorter, J.; Wall, H. M. *J. Chem. Soc., B* **1968**, 631.
- (9) Vidal-Ferran, A.; Moyano, A.; Pericas, M. A.; Riera, A. *J. Org. Chem.* **1997**, *62*, 4970.
- (10) Reddy, C. R.; Radhika, L.; Kumar, T. P.; Chandrasekhar, S. *Eur. J. Org. Chem.* **2011**, *2011*, 5967.
- (11) Ali, I. A. I.; El Ashry, E. S. H.; Schmidt, R. R. *Eur. J. Org. Chem.* **2003**, 4121.
- (12) Steinbeck, M.; Frey, G. D.; Schoeller, W. W.; Herrmann, W. A. *J. Organomet. Chem.* **2011**, *696*, 3945.
- (13) Bordwell, F. G.; Harrelson, J. A., Jr. *J. Org. Chem.* **1989**, *54*, 4893.
- (14) Maslak, P.; Guthrie, R. D. *J. Am. Chem. Soc.* **1986**, *108*, 2628.
- (15) Barluenga, J.; Fananas, F. J.; Sanz, R.; Marcos, C.; Trabada, M. *Org. Lett.* **2002**, *4*, 1587.
